# Supplementary material for: Radical trideuteromethylation with deuterated dimethyl sulfoxide in the synthesis of heterocycles and labelled building blocks
Source: Royal Society of Chemistry journal article supplement (doi:10.1039/c6cc07196a), 2016-01-01

## Radical Trideuteromethylation in the Synthesis of Heterocycles and Labelled Building Blocks

Roberta Caporaso,<sup>a,b,c</sup> Srimanta Manna,<sup>a,b</sup> Sarah Zinken,<sup>a,b</sup> Alexander R. Kochnev,<sup>d</sup> Evgeny R. Lukyanenko,<sup>d</sup> Alexander V. Kurkin,<sup>d</sup> and Andrey P. Antonchick<sup>\*,a,b</sup>

<sup>a</sup> Chemical Biology, Max Planck Institute of Molecular Physiology, Otto-Hahn-Straße 11, 44227 Dortmund, Germany

<sup>b</sup> Chemical Biology, Department of Chemistry and Chemical Biology, Technical University Dortmund, Otto-Hahn-Straße 4a, 44227 Dortmund, Germany

<sup>c</sup> Department of Pharmacy and Biotechnology, University of Bologna, Via Belmeloro 6, 40126 Bologna, Italy

<sup>d</sup> Department of Chemistry, Lomonosov Moscow State University, 1/3 Leninskie Gory, 119991 Moscow, Russia

\*Email: [Andrey.Antonchick@mpi-dortmund.mpg.de](mailto:Andrey.Antonchick@mpi-dortmund.mpg.de)

### Table of contents

|                                 |     |
|---------------------------------|-----|
| 1. General                      | S2  |
| 2. General procedures           | S3  |
| 3. Characterization of products | S4  |
| 4. Copies of NMR spectra        | S17 |

## General

Unless otherwise noted, all commercially available compounds were used as provided without further purification. Solvents for chromatography were technical grade. Analytical thin-layer chromatography (TLC) was performed on Merck silica gel aluminium plates with F-254 indicator. Compounds were visualized by irradiation with UV light or potassium permanganate staining. Column chromatography was performed using silica gel Merck 60 (particle size 0.040-0.063 mm). Solvent mixtures are understood as volume/volume.  $^1\text{H}$ -NMR and  $^{13}\text{C}$ -NMR were recorded on a Bruker DRX500 (500 MHz) and Bruker DRX600 (600 MHz) using  $\text{CDCl}_3$ ,  $\text{CD}_3\text{OD}$  or  $\text{DMSO}-d_6$  as solvent. Data are reported in the following order: chemical shift ( $\delta$ ) values are reported in ppm with the solvent resonance as internal standard ( $\text{CDCl}_3$ :  $\delta = 7.26$  ppm for  $^1\text{H}$ ,  $\delta = 77.16$  ppm for  $^{13}\text{C}$ ;  $\text{CD}_3\text{OD}$ :  $\delta = 3.31$  ppm for  $^1\text{H}$ ,  $\delta = 49.00$  ppm for  $^{13}\text{C}$ ;  $\text{DMSO}-d_6$ :  $\delta = 2.50$  ppm for  $^1\text{H}$ ,  $\delta = 39.52$  ppm for  $^{13}\text{C}$ ); multiplicities are indicated by s (broadened singlet), s (singlet), d (doublet), t (triplet), q (quartet), m (multiplet), quin (quintet); coupling constants ( $J$ ) are given in Hertz (Hz). High resolution mass spectra were recorded on a LTQ Orbitrap mass spectrometer coupled to an Acceka HPLC-System (HPLC column: Hypersyl GOLD, 50 mm x 1 mm, particle size 1.9  $\mu\text{m}$ , ionization method: electron spray ionization). Fourier transform infrared spectroscopy (FT-IR) spectra were obtained with a Bruker Tensor 27 spectrometer (ATR, neat) and are reported in terms of frequency of absorption ( $\text{cm}^{-1}$ ).

### **Method A for the preparation of Trideuteromethylated compounds (2b-2k)**

To a screw capped reaction vial containing quinoline or isoquinoline (0.5 mmol) in DMSO-*d*<sub>6</sub> (1 mL) FeCl<sub>2</sub> (0.25 mmol) and TFA (0.75 mmol) were added. Then H<sub>2</sub>O<sub>2</sub> (30 % in water) (2.50 mmol) was added slowly and portion-wise and the reaction was stirred at room temperature under air until full conversion monitored by TLC and GC-MS. Afterwards residual trifluoacetic acid was neutralized by adding NEt<sub>3</sub> (1 mmol) and the reaction mixture was diluted with water. The aqueous phase was extracted three times with ethyl acetate and the combined organic layers were dried over MgSO<sub>4</sub>. Subsequently, column chromatography of the reaction mixture provided the pure product using petroleum ether/EtOAc or dichloromethane/MeOH as eluent system.

### **Method B for the preparation of Trideuteromethylated compounds (4a-4j, 8)**

To a screw capped reaction vial containing *N*-arylacrylamide (0.2 mmol) in DMSO-*d*<sub>6</sub> (1 mL) FeCl<sub>2</sub> (0.10 mmol) and TFA (0.20 mmol) were added. Then H<sub>2</sub>O<sub>2</sub> (30 % in water) (1 mmol) was added slowly and portion-wise and the reaction was stirred at room temperature under air until full conversion monitored by TLC and GC-MS. Afterwards residual trifluoacetic acid was neutralized by adding NEt<sub>3</sub> (0.50 mmol) and the reaction mixture was diluted with water. The aqueous phase was extracted three times with ethyl acetate and the combined organic layers were dried over MgSO<sub>4</sub>. Subsequently, column chromatography of the reaction mixture provided the pure product using petroleum ether/EtOAc as eluent system.

### **Method C for the preparation of Trideuteromethylated compounds (6a-6d)**

To a screw capped reaction vial containing activated alkenes (0.5 mmol) in DMSO-*d*<sub>6</sub> (1 mL) FeCl<sub>2</sub> (0.25 mmol) and TFA (0.75 mmol) were added. Then H<sub>2</sub>O<sub>2</sub> (30 % in water) (2.50 mmol) was added slowly and portion-wise and the reaction was stirred at room temperature under air until full conversion monitored by TLC and GC-MS. Afterwards residual trifluoacetic acid was neutralized by adding NEt<sub>3</sub> (1 mmol) and the reaction mixture was diluted with water. The aqueous phase was extracted three times with ethyl acetate and the combined organic layers were dried over MgSO<sub>4</sub>. Subsequently, column chromatography of the reaction mixture provided the pure product using petroleum ether/EtOAc as eluent system.

## Characterization of products

Substrates were prepared according to literature procedure<sup>[1]</sup>.

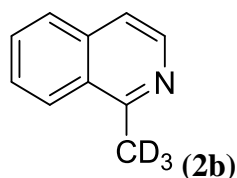

### 1-[<sup>2</sup>H<sub>3</sub>]-Methylisoquinoline

Prepared according to the method A; the product was obtained as colorless oil (yield 83%);  $R_f = 0.43$  (petroleum ether/EtOAc = 70/30 v/v).

<sup>1</sup>H NMR (500 MHz, CDCl<sub>3</sub>) δ 8.39 (d,  $J = 5.8$  Hz, 1H), 8.12 (d,  $J = 8.4$  Hz, 1H), 7.81 (d,  $J = 8.4$  Hz, 1H), 7.72-7.66 (m, 1H), 7.63-7.58 (m, 1H), 7.52 ppm (d,  $J = 5.8$  Hz, 1H).

<sup>13</sup>C NMR (126 MHz, CDCl<sub>3</sub>) δ 158.69, 141.69, 136.04, 130.20, 127.35, 127.25, 125.82, 125.80, 119.51, 22.12 ppm (quin,  $J = 19.5$  Hz).

FT-IR:  $\tilde{\nu} = 2959, 2922, 2852, 1562, 1417, 1259$  cm<sup>-1</sup>.

HRMS: calc. for [M+H]<sup>+</sup> C<sub>10</sub>H<sub>7</sub><sup>2</sup>H<sub>3</sub>N: 147.09961 found: 147.09951.

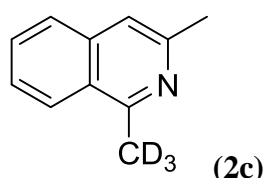

### 1-[<sup>2</sup>H<sub>3</sub>]-Methyl-3-methylisoquinoline

Prepared according to the method A; the product was obtained as pale yellow solid (yield 55%);  $R_f = 0.37$  (petroleum ether/EtOAc = 50/50 v/v).

<sup>1</sup>H NMR (500 MHz, CDCl<sub>3</sub>) δ 8.05 (d,  $J = 8.4$  Hz, 1H), 7.69 (d,  $J = 8.4$  Hz, 1H), 7.63-7.58 (m, 1H), 7.53-7.47 (m, 1H), 7.33 (s, 1H), 2.65 ppm (s, 3H).

<sup>13</sup>C NMR (126 MHz, CDCl<sub>3</sub>) δ 158.11, 150.26, 136.74, 130.04, 126.70, 126.15, 125.69, 125.66, 117.33, 24.33, 21.65 (quin,  $J = 19.5$  Hz) ppm.

FT-IR:  $\tilde{\nu} = 3048, 2981, 2918, 1589, 1565, 1359$  cm<sup>-1</sup>.

HRMS: calc. for [M+H]<sup>+</sup> C<sub>11</sub>H<sub>9</sub><sup>2</sup>H<sub>3</sub>N: 161.11526 found: 161.11531.

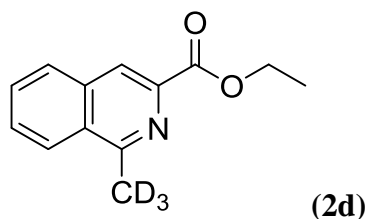

### Ethyl 1-[[<sup>2</sup>H<sub>3</sub>]-Methyl]-isoquinoline-3-carboxylate

Prepared according to the method A; the product was obtained as pale yellow solid (yield 65%);  $R_f = 0.5$  (petroleum ether/EtOAc = 50/50 v/v).

<sup>1</sup>H NMR (500 MHz, CDCl<sub>3</sub>) δ 8.43 (s, 1H), 8.17 (d,  $J = 8.0$  Hz, 1H), 7.94 (d,  $J = 8.0$  Hz, 1H), 7.78-7.69 (m, 2H), 4.51 (q,  $J = 7.1$  Hz, 2H), 1.46 ppm (t,  $J = 7.1$  Hz, 3H).

<sup>13</sup>C NMR (126 MHz, CDCl<sub>3</sub>) δ 165.96, 159.50, 140.48, 135.54, 130.91, 129.54, 129.02, 128.79, 125.93, 123.05, 61.94, 21.91 (quin,  $J = 19.5$  Hz), 14.49 ppm.

FT-IR:  $\tilde{\nu} = 3064, 2988, 2924, 1727, 1498, 1316, 1237, 1022$  cm<sup>-1</sup>.

HRMS: calc. for [M+H]<sup>+</sup> C<sub>13</sub>H<sub>11</sub><sup>2</sup>H<sub>3</sub>O<sub>2</sub>N: 219.12074 found: 219.12110.

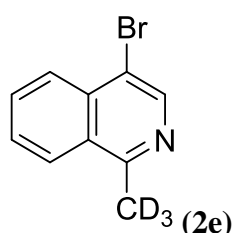

### 1-[[<sup>2</sup>H<sub>3</sub>]-Methyl]-4-bromoisoquinoline

Prepared according to the method A; the product was obtained as white solid (yield 65%);  $R_f = 0.28$  (petroleum ether/EtOAc = 70/30 v/v).

<sup>1</sup>H NMR (500 MHz, CDCl<sub>3</sub>) δ 8.58 (s, 1H), 8.17 (d,  $J = 8.4$  Hz, 1H), 8.10 (d,  $J = 8.4$  Hz, 1H), 7.80 (t,  $J = 7.7$  Hz, 1H), 7.67 ppm (t,  $J = 7.7$  Hz, 1H).

<sup>13</sup>C NMR (126 MHz, CDCl<sub>3</sub>) δ 158.27, 143.35, 134.68, 131.41, 128.84, 128.17, 126.72, 126.21, 118.01 ppm.

FT-IR:  $\tilde{\nu} = 3068, 3036, 2989, 1556, 1378, 1271$  cm<sup>-1</sup>.

HRMS: calc. for [M+H]<sup>+</sup> C<sub>10</sub>H<sub>6</sub><sup>2</sup>H<sub>3</sub>N<sup>79</sup>Br: 225.01012 found: 225.01096; calc. for [M+H]<sup>+</sup> C<sub>10</sub>H<sub>6</sub><sup>2</sup>H<sub>3</sub>N<sup>81</sup>Br: 227.00807 found: 227.00857.

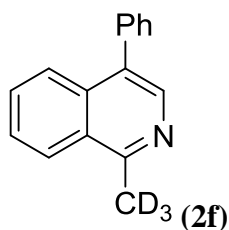

### 1-[<sup>2</sup>H<sub>3</sub>]-Methyl-4-phenylisoquinoline

Prepared according to the method A; the product was obtained as pale white solid (yield 73%);  $R_f = 0.5$  (petroleum ether/EtOAc = 50/50 v/v).

<sup>1</sup>H NMR (600 MHz, CDCl<sub>3</sub>) δ 8.36 (s, 1H), 8.20 (d,  $J = 8.0$  Hz, 1H), 7.91 (d,  $J = 8.0$  Hz, 1H), 7.67-7.62 (m, 2H), 7.55-7.44 ppm (m, 5H).

<sup>13</sup>C NMR (151 MHz, CDCl<sub>3</sub>) δ 158.01, 141.42, 137.39, 134.52, 132.22, 130.35, 130.28 (2C), 128.67 (2C), 127.91, 127.29, 127.09, 126.02, 125.66, 21.95 ppm (quin,  $J = 19.5$  Hz).

FT-IR:  $\tilde{\nu} = 3063, 3028, 1554, 1507, 1387, 1073$  cm<sup>-1</sup>.

HRMS: calc. for [M+H]<sup>+</sup> C<sub>16</sub>H<sub>11</sub><sup>2</sup>H<sub>3</sub>N: 223.13091 found: 223.13121.

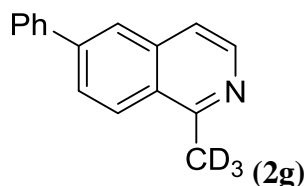

### 1-[<sup>2</sup>H<sub>3</sub>]-Methyl-6-phenylisoquinoline

Prepared according to the method A; the product was obtained as pale yellow oil (yield 71%);  $R_f = 0.34$  (petroleum ether/EtOAc = 50/50 v/v).

<sup>1</sup>H NMR (500 MHz, CDCl<sub>3</sub>) δ 8.40 (d,  $J = 5.7$  Hz, 1H), 8.28-8.23 (m, 1H), 7.95-7.90 (m, 1H), 7.86 (t,  $J = 8.3$  Hz, 1H), 7.70 (d,  $J = 7.9$  Hz, 2H), 7.55-7.47 (m, 3H), 7.45-7.37 ppm (m, 1H).

<sup>13</sup>C NMR (126 MHz, CDCl<sub>3</sub>) δ 158.02, 152.14, 142.99, 141.54, 137.40, 134.43, 132.12, 130.33, 130.20, 128.65 (2C), 127.87 (2C), 127.03, 125.98, 125.61 ppm.

FT-IR:  $\tilde{\nu} = 3050, 3031, 1587, 1489, 1281, 1076$  cm<sup>-1</sup>.

HRMS: calc. for [M+H]<sup>+</sup> C<sub>16</sub>H<sub>11</sub><sup>2</sup>H<sub>3</sub>N: 223.13091 found: 223.13081.

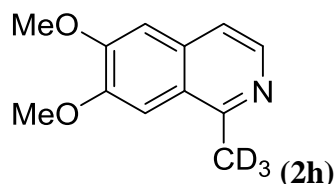

### 1-[[<sup>2</sup>H<sub>3</sub>]-Methyl-6,7-dimethoxy-isoquinoline

Prepared according to the method A; the product was obtained as pale yellow solid (yield 62%);  $R_f = 0.55$  (dichloromethane/MeOH = 90/10 v/v).

<sup>1</sup>H NMR (500 MHz, CD<sub>3</sub>OD)  $\delta$  8.20 (d,  $J = 6.6$  Hz, 1H), 8.06 (d,  $J = 6.6$  Hz, 1H), 7.64 (s, 1H), 7.60 (s, 1H), 4.10 (s, 3H), 4.09 ppm (s, 3H).

<sup>13</sup>C NMR (126 MHz, CD<sub>3</sub>OD)  $\delta$  159.18, 154.37 (2C), 137.92, 129.94, 124.23, 122.85, 107.25, 105.97, 57.36, 57.04, 17.36 ppm (quin,  $J = 19.5$  Hz).

FT-IR:  $\tilde{\nu} = 3068, 2918, 2845, 1507, 1233, 1168, 1114, 1016$  cm<sup>-1</sup>.

HRMS: calc. for [M+H]<sup>+</sup> C<sub>12</sub>H<sub>11</sub><sup>2</sup>H<sub>3</sub>O<sub>2</sub>N: 207.12074 found: 207.12123.

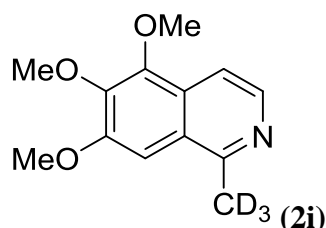

### 1-[[<sup>2</sup>H<sub>3</sub>]-Methyl-5,6,7-trimethoxy-isoquinoline

Prepared according to the method A; the product was obtained as pale yellow solid (yield 77%);  $R_f = 0.28$  (dichloromethane/MeOH = 95/5 v/v).

<sup>1</sup>H NMR (500 MHz, CDCl<sub>3</sub>+ CD<sub>3</sub>OD)  $\delta$  8.41-8.26 (m, 1H), 8.00 (d,  $J = 6.0$  Hz, 1H), 7.16 (s, 1H), 4.05 (s, 3H), 4.03 ppm (s, 6H).

<sup>13</sup>C NMR (126 MHz, CDCl<sub>3</sub>+ CD<sub>3</sub>OD) <sup>13</sup>C NMR (126 MHz, CDCl<sub>3</sub>)  $\delta$  155.44, 154.41, 146.86, 146.76, 129.72, 124.18, 116.06, 100.38, 100.05, 61.88, 61.48, 56.43, 41.91 ppm (quin,  $J = 19.5$  Hz).

FT-IR:  $\tilde{\nu} = 2889, 1507, 1280, 1146, 1017$  cm<sup>-1</sup>;

HRMS: calc. for [M+H]<sup>+</sup> C<sub>13</sub>H<sub>13</sub><sup>2</sup>H<sub>3</sub>O<sub>3</sub>N: 237.13130 found: 237.13117.

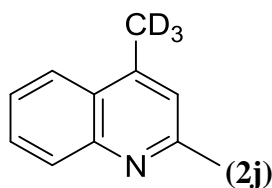

#### 4-[[<sup>2</sup>H<sub>3</sub>]-Methyl]-2-methylquinoline

Prepared according to the method A; the product was obtained as pale yellow solid (yield 73%);  $R_f = 0.5$  (petroleum ether/EtOAc = 50/50 v/v).

<sup>1</sup>H NMR (500 MHz, CDCl<sub>3</sub>) δ 8.01 (d,  $J = 8.4$  Hz, 1H), 7.92 (d,  $J = 8.4$  Hz, 1H), 7.67-7.64 (m, 1H), 7.50-7.47 (t,  $J = 7.6$  Hz, 1H), 7.11 (s, 1H), 2.69 ppm (s, 3H).

<sup>13</sup>C NMR (126 MHz, CDCl<sub>3</sub>) δ 158.73, 147.64, 144.29, 129.24, 129.11, 126.65, 125.53, 123.70, 122.83, 25.30, 17.93 ppm (quin,  $J = 19.5$  Hz).

FT-IR:  $\tilde{\nu} = 3059, 2989, 2915, 1506, 1338, 1220$  cm<sup>-1</sup>.

HRMS: calc. for [M+H]<sup>+</sup> C<sub>11</sub>H<sub>9</sub><sup>2</sup>H<sub>3</sub>N: 161.11526 found: 161.11535.

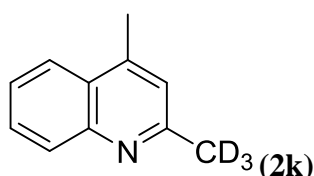

#### 2-[[<sup>2</sup>H<sub>3</sub>]-Methyl]-4-methylquinoline

Prepared according to the method A; the product was obtained as pale yellow oil (yield 53%);  $R_f = 0.5$  (petroleum ether/EtOAc = 50/50 v/v).

<sup>1</sup>H NMR (500 MHz, CDCl<sub>3</sub>) δ 8.02 (d,  $J = 8.4$  Hz, 1H), 7.93 (d,  $J = 8.4$  Hz, 1H), 7.66 (t,  $J = 7.6$  Hz, 1H), 7.49 (t,  $J = 7.6$  Hz, 1H), 7.12 (s, 1H), 2.66 ppm (s, 3H).

<sup>13</sup>C NMR (126 MHz, CDCl<sub>3</sub>) δ 158.69, 147.65, 144.39, 129.26, 129.13, 126.64, 125.55, 123.70, 122.83, 24.61 (quin,  $J = 19.5$  Hz), 18.73 ppm.

FT-IR:  $\tilde{\nu} = 3059, 2974, 1560, 1508, 1343$  cm<sup>-1</sup>.

HRMS: calc. for [M+H]<sup>+</sup> C<sub>11</sub>H<sub>9</sub><sup>2</sup>H<sub>3</sub>N: 161.11526 found: 161.11517.

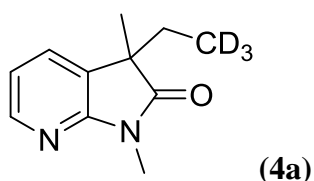



### 3-[2-<sup>2</sup>H<sub>3</sub>]-Ethyl-1,3-dimethyl-1,3-dihydro-2H-pyrrolo[2,3-*b*]pyridin-2-one

Prepared according to the method B; the product was obtained as colorless oil (yield 91%);  $R_f = 0.43$  (petroleum ether/EtOAc = 60/40 v/v).

<sup>1</sup>H NMR (500 MHz, CDCl<sub>3</sub>) δ 8.17 (dd,  $J = 5.3, 1.5$  Hz, 1H), 7.39 (dd,  $J = 7.2, 1.5$  Hz, 1H), 6.95 (dd,  $J = 7.2, 5.3$  Hz, 1H), 3.29 (s, 3H), 1.92 (d,  $J = 13.5$  Hz, 1H), 1.76 (d,  $J = 13.5$  Hz, 1H), 1.36 ppm (s, 3H).

<sup>13</sup>C NMR (126 MHz, CDCl<sub>3</sub>) δ 180.47, 157.09, 146.61, 130.02, 128.38, 118.15, 48.69, 30.88, 25.36, 22.83, 8.14 ppm (quin,  $J = 19.5$  Hz).

FT-IR:  $\tilde{\nu} = 2868, 2923, 1716, 1592, 1468, 1346, 1136, 1027$  cm<sup>-1</sup>.

HRMS: calc. for [M+H]<sup>+</sup> C<sub>11</sub>H<sub>12</sub><sup>2</sup>H<sub>3</sub>ON<sub>2</sub>: 194.13672 found: 194.13680.

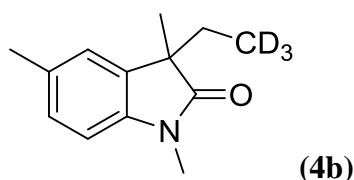

### 3-[2-<sup>2</sup>H<sub>3</sub>]-Ethyl-1,3,5-trimethylindolin-2-one

Prepared according to the method B; the product was obtained as pale yellow oil (yield 61%);  $R_f = 0.55$  (petroleum ether/EtOAc = 70/30 v/v).

<sup>1</sup>H NMR (500 MHz, CDCl<sub>3</sub>) δ 7.05 (d,  $J = 7.8$  Hz, 1H), 6.98 (s, 1H), 6.72 (d,  $J = 7.8$  Hz, 1H), 3.19 (s, 3H), 2.35 (s, 3H), 1.90 (d,  $J = 13.5$  Hz, 1H), 1.73 (d,  $J = 13.5$  Hz, 1H), 1.34 ppm (s, 3H).

<sup>13</sup>C NMR (126 MHz, CDCl<sub>3</sub>) δ 180.83, 141.18, 134.08, 131.98, 127.90, 123.48, 107.63, 49.07, 31.32, 26.20, 23.50, 21.29, 8.18 ppm (quin,  $J = 19.5$  Hz).

FT-IR:  $\tilde{\nu} = 2965, 2919, 1703, 1601, 1499, 1349, 1152, 1135$  cm<sup>-1</sup>.

HRMS: calc. for [M+H]<sup>+</sup> C<sub>13</sub>H<sub>15</sub><sup>2</sup>H<sub>3</sub>ON: 207.15712 found: 207.15722.

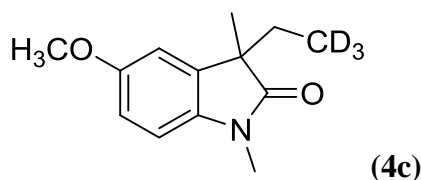

### 3-[2-<sup>2</sup>H<sub>3</sub>]-Ethyl-5-methoxy-1,3-dimethylindolin-2-one

Prepared according to the method B; the product was obtained as colorless oil (yield 65%);  $R_f = 0.40$  (petroleum ether/EtOAc = 70/30 v/v).

**<sup>1</sup>H NMR (500 MHz, CDCl<sub>3</sub>)** δ 6.79-6.76 (m, 2H), 6.72 (d, *J* = 9.1 Hz, 1H), 3.79 (s, 3H), 3.17 (s, 3H), 1.89 (d, *J* = 13.5 Hz, 1H), 1.70 (d, *J* = 13.5 Hz, 1H), 1.32 ppm (s, 3H).

**<sup>13</sup>C NMR (126 MHz, CDCl<sub>3</sub>)** δ 180.48, 156.08, 137.11, 135.48, 111.47, 110.37, 108.10, 55.86, 49.46, 31.33, 26.25, 23.52, 8.14 ppm (quin, *J* = 19.5 Hz).

**FT-IR:**  $\tilde{\nu}$  = 2920, 1700, 1598, 1497, 1290, 1118, 1039 cm<sup>-1</sup>.

**HRMS:** calc. for [M+H]<sup>+</sup> C<sub>13</sub>H<sub>15</sub><sup>2</sup>H<sub>3</sub>O<sub>2</sub>N: 223.15204 found: 223.15240.

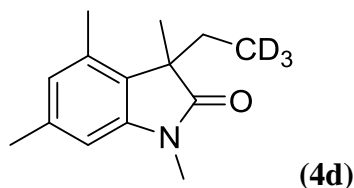

### 3-[2-<sup>2</sup>H<sub>3</sub>]-Ethyl-1,3,4,6-tetramethylindolin-2-one

Prepared according to the method B; the product was obtained as pale yellow oil (yield 70%); *R*<sub>f</sub> = 0.53 (petroleum ether/EtOAc = 70/30 v/v).

**<sup>1</sup>H NMR (500 MHz, CDCl<sub>3</sub>)** δ 6.65 (s, 1H), 6.51 (s, 1H), 3.18 (s, 3H), 2.34 (s, 3H), 2.31 (s, 3H), 1.96 (s, 2H), 1.40 ppm (s, 3H).

**<sup>13</sup>C NMR (126 MHz, CDCl<sub>3</sub>)** δ 181.17, 143.96, 137.55, 133.95, 127.46, 125.60, 106.73, 50.01, 29.27, 26.25, 22.37, 21.67, 18.11, 8.54 ppm (quin, *J* = 19.5 Hz).

**FT-IR:**  $\tilde{\nu}$  = 2927, 1708, 1618, 1454, 1238, 1059 cm<sup>-1</sup>.

**HRMS:** calc. for [M+H]<sup>+</sup> C<sub>14</sub>H<sub>17</sub><sup>2</sup>H<sub>3</sub>ON: 221.17277 found: 221.17338.

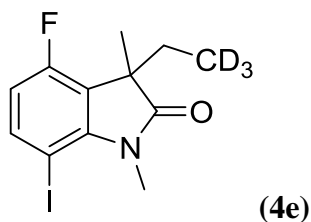

### 3-[2-<sup>2</sup>H<sub>3</sub>]-Ethyl-4-fluoro-7-iodo-1,3-dimethylindolin-2-one

Prepared according to the method B; the product was obtained as pale white solid (yield 76%); *R*<sub>f</sub> = 0.47 (petroleum ether/EtOAc = 80/20 v/v).

**<sup>1</sup>H NMR (500 MHz, CDCl<sub>3</sub>)** δ 7.37-7.31 (m, 1H), 7.24-7.21 (m, 1H), 3.62-3.30 (m, 3H), 1.90 (d, *J* = 13.5 Hz, 1H), 1.69 (d, *J* = 13.5 Hz, 1H), 1.33 ppm (s, 3H).

$^{13}\text{C}$  NMR (126 MHz,  $\text{CDCl}_3$ ) $\delta$  179.66, 147.43 (d,  $J = 248.9$  Hz), 139.03 (d,  $J = 3.2$  Hz), 130.23 (d,  $J = 7.9$  Hz), 127.63 (d,  $J = 3.2$  Hz), 124.82 (d,  $J = 21.8$  Hz), 83.47 (d,  $J = 6.6$  Hz), 49.54, 31.53, 28.63 (d,  $J = 5.6$  Hz), 23.63, 8.15 ppm (quin,  $J = 19.5$  Hz).

FT-IR:  $\tilde{\nu} = 2929, 2859, 1708, 1621, 1417, 1258$   $\text{cm}^{-1}$ .

HRMS: calc. for  $[\text{M}+\text{H}]^+ \text{C}_{12}\text{H}_{11}^2\text{H}_3\text{ONFI}$ : 337.02869 found: 337.02910.

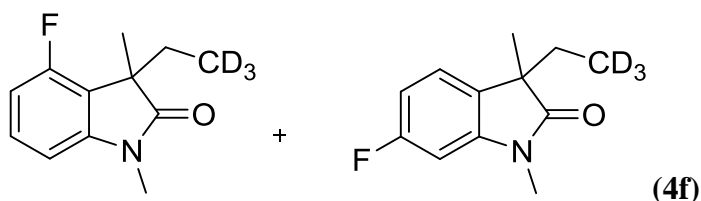

### 3-[2- $^2\text{H}_3$ ]-Ethyl-4-fluoro-1,3-dimethylindolin-2-one and 3-[2- $^2\text{H}_3$ ]-ethyl-6-fluoro-1,3-dimethylindolin-2-one, 4f-major and 4f-minor

Prepared according to the method B; the product was obtained as colorless oil as a mixture of regioisomers (r.r. = 1.5:1; yield 90%);  $R_f = 0.57$  (petroleum ether/EtOAc = 70/30 v/v).

For major regioisomer:  $^1\text{H}$  NMR (500 MHz,  $\text{CDCl}_3$ ) $\delta$  7.26-7.20 (m, 1H), 6.73 (t,  $J = 7.7$  Hz, 1H), 6.64 (d,  $J = 7.7$  Hz, 1H), 3.20 (s, 3H), 1.95 (q,  $J = 13.5$  Hz, 2H), 1.44 ppm (s, 3H).

$^{13}\text{C}$  NMR (126 MHz,  $\text{CDCl}_3$ ) $\delta$  180.24, 159.02 (d,  $J = 246.8$  Hz), 145.60 (d,  $J = 10.5$  Hz), 129.47 (d,  $J = 8.6$  Hz), 123.47 (d,  $J = 9.7$  Hz), 110.21 (d,  $J = 21.2$  Hz), 104.11 (d,  $J = 3.1$  Hz), 48.71, 29.90, 26.63, 22.23, 8.39 ppm (quin,  $J = 19.5$  Hz).

For minor regioisomer:  $^1\text{H}$  NMR (500 MHz,  $\text{CDCl}_3$ ) $\delta$  7.10-7.05 (m, 1H), 6.73 (t,  $J = 8.6$  Hz, 1H), 6.58 (dd,  $J = 8.6, 2.3$  Hz, 1H), 3.19 (s, 3H), 1.88 (d,  $J = 13.5$  Hz, 1H), 1.72 (d,  $J = 13.5$  Hz, 1H), 1.33 ppm (s, 3H).

$^{13}\text{C}$  NMR (126 MHz,  $\text{CDCl}_3$ ) $\delta$  181.16, 162.86 (d,  $J = 243.8$  Hz), 144.96 (d,  $J = 11.5$  Hz), 129.21 (d,  $J = 2.9$  Hz), 118.88 (d,  $J = 20.1$  Hz), 108.42 (d,  $J = 22.2$  Hz), 96.82 (d,  $J = 27.4$  Hz), 49.50, 31.35, 26.32, 23.52, 8.39 ppm (quin,  $J = 19.5$  Hz).

FT-IR:  $\tilde{\nu} = 2970, 1711, 1618, 1474, 1377, 1235, 1046$   $\text{cm}^{-1}$ .

HRMS: calc. for  $[\text{M}+\text{H}]^+ \text{C}_{12}\text{H}_{12}^2\text{H}_3\text{ONF}$ : 211.13205 found: 211.13247.

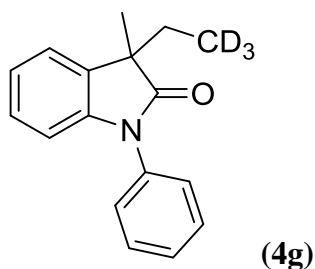

### 3-[2-<sup>2</sup>H<sub>3</sub>]-Ethyl-3-methyl-1-phenylindolin-2-one

Prepared according to the method B; the product was obtained as colorless oil (yield 89%);  $R_f = 0.61$  (petroleum ether/EtOAc = 70/30 v/v).

<sup>1</sup>H NMR (500 MHz, CDCl<sub>3</sub>) δ 7.55-7.49 (m, 2H), 7.43-7.38 (m, 3H), 7.24 (dd,  $J = 7.7, 1.2$  Hz, 1H), 7.19 (td,  $J = 7.7, 1.2$  Hz, 1H), 7.11 (td,  $J = 7.7, 1.2$  Hz, 1H), 6.84 (d,  $J = 7.9$  Hz, 1H), 2.04 (d,  $J = 13.5$  Hz, 1H), 1.84 (d,  $J = 13.5$  Hz, 1H), 1.48 ppm (s, 3H).

<sup>13</sup>C NMR (126 MHz, CDCl<sub>3</sub>) δ 180.31, 143.49, 134.76, 133.80, 129.66 (2C), 128.01, 127.63, 126.68 (2C), 123.01, 122.93, 109.27, 49.09, 31.94, 23.75. 8.22 ppm (quin,  $J = 19.5$  Hz).

FT-IR:  $\tilde{\nu} = 2966, 2920, 1718, 1499, 1373, 1175$  cm<sup>-1</sup>.

HRMS: calc. for [M+H]<sup>+</sup> C<sub>17</sub>H<sub>15</sub><sup>2</sup>H<sub>3</sub>ON: 255.15712 found: 255.15735.

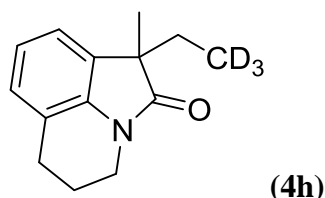

### 1-[2-<sup>2</sup>H<sub>3</sub>]-Ethyl-1-methyl-5,6-dihydro-4H-pyrrolo[3,2,1-*ij*]quinolin-2(1H)-one

Prepared according to the method B; the product was obtained as colorless oil (yield 79%);  $R_f = 0.37$  (petroleum ether/EtOAc = 70/30 v/v).

<sup>1</sup>H NMR (500 MHz, CDCl<sub>3</sub>) δ 7.02-6.98 (m, 2H), 6.97-6.92 (m, 1H), 3.71 (t,  $J = 5.9$  Hz, 2H), 2.81-2.77 (m, 2H), 2.02-1.98 (m, 2H), 1.87 (d,  $J = 13.5$  Hz, 1H), 1.75 (d,  $J = 13.5$  Hz, 1H), 1.35 ppm (s, 3H).

<sup>13</sup>C NMR (126 MHz, CDCl<sub>3</sub>) δ 179.78, 139.25, 132.57, 126.49, 121.91, 120.52, 119.98, 50.35, 38.77, 31.03, 24.74, 23.03, 21.41, 8.21 ppm (quin,  $J = 19.5$  Hz).

FT-IR:  $\tilde{\nu} = 2962, 2923, 1480, 1371, 1239, 1165, 1023$  cm<sup>-1</sup>.

HRMS: calc. for [M+H]<sup>+</sup> C<sub>14</sub>H<sub>15</sub><sup>2</sup>H<sub>3</sub>ON: 219.15712 found: 219.15768.

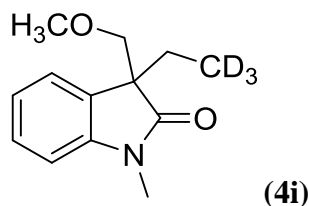

### 3-[2-<sup>2</sup>H<sub>3</sub>]-Ethyl-3-(methoxymethyl)-1-methylindolin-2-one

Prepared according to the method B; the product was obtained as colorless oil (yield 85%);  $R_f = 0.29$  (eluent petroleum ether/EtOAc = 70/30 v/v).

**<sup>1</sup>H NMR (500 MHz, CDCl<sub>3</sub>)**  $\delta$  7.30-7.26 (m, 1H), 7.25-7.21 (m, 1H), 7.08 (td,  $J = 7.7, 1.2$  Hz, 1H), 6.84 (d,  $J = 7.7$  Hz, 1H), 3.65 (q,  $J = 8.9$  Hz, 2H), 3.22 (s, 3H), 3.21 (s, 3H), 1.86 (d,  $J = 13.5$  Hz, 1H), 1.78 ppm (d,  $J = 13.5$  Hz, 1H).

**<sup>13</sup>C NMR (126 MHz, CDCl<sub>3</sub>)**  $\delta$  178.53, 144.42, 130.95, 128.06, 123.11, 122.53, 107.96, 76.93, 59.65, 54.65, 26.73, 26.26, 7.35 ppm (quin,  $J = 19.5$  Hz).

**FT-IR:**  $\tilde{\nu} = 3054, 2921, 1706, 1611, 1469, 1349, 1196, 1097$  cm<sup>-1</sup>.

**HRMS:** calc. for [M+H]<sup>+</sup> C<sub>13</sub>H<sub>15</sub><sup>2</sup>H<sub>3</sub>O<sub>2</sub>N: 223.15204 found: 223.15260.

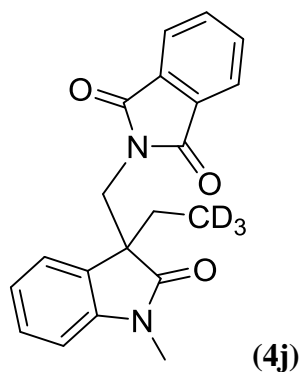

### 2-[[3-[2-<sup>2</sup>H<sub>3</sub>]-Ethyl-1-methyl-2-oxoindolin-3-yl]methyl]isoindoline-1,3-dione

Prepared according to the method B; the product was obtained as colorless oil (yield 87%);  $R_f = 0.17$  (petroleum ether/EtOAc = 70/30 v/v).

**<sup>1</sup>H NMR (500 MHz, CDCl<sub>3</sub>)**  $\delta$  7.75 (dd,  $J = 5.5, 3.1$  Hz, 2H), 7.65 (dd,  $J = 5.5, 3.1$  Hz, 2H), 7.20 (dt,  $J = 7.7, 3.9$  Hz, 1H), 7.18-7.14 (m, 1H), 6.97 (td,  $J = 7.8, 0.6$  Hz, 1H), 6.77 (d,  $J = 7.8$  Hz, 1H), 4.04 (d,  $J = 1.2$  Hz, 2H), 3.20 (s, 3H), 2.10 (d,  $J = 13.5$  Hz, 1H), 1.93 ppm (d,  $J = 13.5$  Hz, 1H).

**<sup>13</sup>C NMR (126 MHz, CDCl<sub>3</sub>)**  $\delta$  178.00, 168.14, 144.31, 134.03 (2C), 131.79, 129.02, 128.53, 123.73 (2C), 123.43 (2C), 122.35, 108.02, 53.56, 43.21, 28.62, 26.39, 7.88 ppm (quin,  $J = 19.5$  Hz).

**FT-IR:**  $\tilde{\nu} = 3056, 2919, 1706, 1610, 1468, 1392, 1068 \text{ cm}^{-1}$ .

**HRMS:** calc. for  $[M+H]^+ \text{C}_{20}\text{H}_{16}^2\text{H}_3\text{O}_3\text{N}_2$ : 338.15785 found: 338.15784.

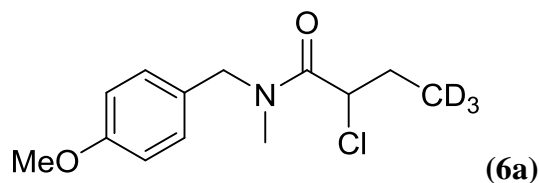

### 2-Chloro-*N*-(4-methoxybenzyl)-*N*-methyl-[4-<sup>2</sup>H<sub>3</sub>]-butanamide

Prepared according to the method C; the product was obtained as colorless oil (yield 75%);

$R_f = 0.40$  (petroleum ether/EtOAc = 70/30 v/v).

**<sup>1</sup>H NMR (500 MHz, DMSO-*d*<sub>6</sub>, 90 °C)**  $\delta$  7.17 (d,  $J = 8.5$  Hz, 2H), 6.91 (d,  $J = 8.5$  Hz, 2H), 4.82-4.75 (m, 1H), 4.54 (s, 2H), 3.76 (s, 3H), 3.04 (s, 3H), 2.00 (dd,  $J = 13.5, 6.3$  Hz, 1H), 1.84 ppm (dd,  $J = 13.5, 6.3$  Hz, 1H).

**<sup>13</sup>C NMR (126 MHz, DMSO-*d*<sub>6</sub>, 25 °C)**  $\delta$  168.21, 168.06, 158.68, 158.52, 129.12, 128.94, 128.72, 128.34, 114.12, 113.97, 55.92, 55.38, 55.13, 55.08, 51.79, 49.77, 34.52, 33.59, 27.78, 27.35, 9.87 ppm (quin,  $J = 17.6$  Hz).

**FT-IR:**  $\tilde{\nu} = 2934, 1651, 1511, 1244, 1175, 1031 \text{ cm}^{-1}$ .

**HRMS:** calc. for  $[M+H]^+ \text{C}_{13}\text{H}_{16}^2\text{H}_3\text{O}_2\text{N}^{35}\text{Cl}$ : 259.12871 found: 259.12890; calc. for  $[M+H]^+ \text{C}_{13}\text{H}_{16}^2\text{H}_3\text{O}_2\text{N}^{37}\text{Cl}$ : 261.12576 found: 261.12554.

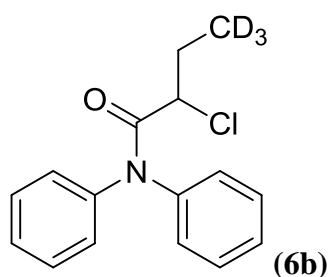

### 2-Chloro-*N,N*-diphenyl-[4-<sup>2</sup>H<sub>3</sub>]-butanamide

Prepared according to the method C; the product was obtained as pale yellow oil (yield 56%);

$R_f = 0.47$  (petroleum ether/EtOAc = 90/10 v/v).

**<sup>1</sup>H NMR (600 MHz, CDCl<sub>3</sub>)** <sup>1</sup>H NMR (500 MHz, CDCl<sub>3</sub>)  $\delta$  7.51-7.29 (m, 8H), 7.24-7.16 (m, 2H), 4.21 (t,  $J = 7.3$  Hz, 1H), 2.15 (dd,  $J = 13.8, 7.5$  Hz, 1H), 1.93 ppm (dd,  $J = 13.8, 7.0$  Hz, 1H).

$^{13}\text{C}$  NMR (151 MHz,  $\text{CDCl}_3$ )  $\delta$  169.20, 142.35, 142.05, 130.17 (2C), 129.13 (2C), 128.76 (2C), 128.50, 126.66, 126.32 (2C), 56.52, 28.23, 10.26 ppm (quin,  $J = 20.16$  Hz).

FT-IR:  $\tilde{\nu} = 3062, 3039, 1679, 1489, 1325, 1235$   $\text{cm}^{-1}$ .

HRMS: calc. for  $[\text{M}+\text{H}]^+$   $\text{C}_{16}\text{H}_{14}^2\text{H}_3\text{ON}^{35}\text{Cl}$ : 277.11815 found: 277.11775; calc. for  $[\text{M}+\text{H}]^+$   $\text{C}_{16}\text{H}_{14}^2\text{H}_3\text{ON}^{37}\text{Cl}$ : 279.11520 found: 279.11466.

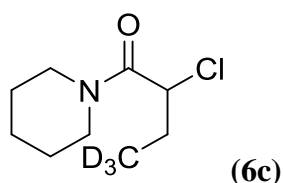

### 2-Chloro-1-(piperidin-1-yl)-[4- $^2\text{H}_3$ ]-butan-1-one

Prepared according to the method C; the product was obtained as pale white solid (yield 65%);  $R_f = 0.57$  (petroleum ether/EtOAc = 50/50 v/v).

$^1\text{H}$  NMR (500 MHz,  $\text{CDCl}_3$ )  $\delta$  4.34 (dd,  $J = 7.8, 6.1$  Hz, 1H), 3.73-3.64 (m, 1H), 3.59-3.50 (m, 1H), 3.50-3.39 (m, 2H), 2.07 (dd,  $J = 14.2, 6.1$  Hz, 1H), 1.94 (dd,  $J = 14.2, 7.8$  Hz, 1H), 1.74-1.51 ppm (m, 6H).

$^{13}\text{C}$  NMR (126 MHz,  $\text{CDCl}_3$ )  $\delta$  166.91, 55.98, 47.14, 43.64, 27.78, 26.53, 25.63, 24.58, 10.41 ppm (quin,  $J = 19.5$  Hz).

FT-IR:  $\tilde{\nu} = 2937, 2856, 1645, 1441, 1274, 1137, 1010$   $\text{cm}^{-1}$ .

HRMS: calc. for  $[\text{M}+\text{H}]^+$   $\text{C}_9\text{H}_{14}^2\text{H}_3\text{ON}^{35}\text{Cl}$ : 193.11815 found: 193.11827; calc. for  $[\text{M}+\text{H}]^+$   $\text{C}_9\text{H}_{14}^2\text{H}_3\text{ON}^{37}\text{Cl}$ : 195.11520 found: 195.11495.

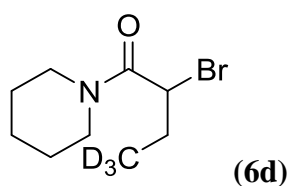

### 2-Bromo-1-(piperidin-1-yl)-[4- $^2\text{H}_3$ ]-butan-1-one

Prepared according to the method C; the product was obtained as pale colorless oil (yield 91%);  $R_f = 0.66$  (petroleum ether/EtOAc = 50/50 v/v).

$^1\text{H}$  NMR (500 MHz,  $\text{CDCl}_3$ )  $\delta$  4.37-4.31 (m, 1H), 3.66 (dd,  $J = 9.0, 4.5$  Hz, 1H), 3.53-3.43 (m, 2H), 3.43-3.35 (m, 1H), 2.12 (dd,  $J = 14.3, 6.4$  Hz, 1H), 2.02 (dd,  $J = 14.3, 6.4$  Hz, 1H), 1.77-1.48 ppm (m, 6H).

$^{13}\text{C}$  NMR (126 MHz,  $\text{CDCl}_3$ )  $\delta$  167.09, 47.32, 45.83, 43.60, 28.18, 26.27, 25.56, 24.52, 11.58 ppm (quin,  $J = 18.9$  Hz).

FT-IR:  $\tilde{\nu} = 2935, 2859, 1632, 1442, 1214, 1120, 1025$   $\text{cm}^{-1}$ .

HRMS: calc. for  $[\text{M}+\text{H}]^+$   $\text{C}_9\text{H}_{14}^2\text{H}_3\text{ON}^{79}\text{Br}$ : 237.06763 found: 237.06844; calc. for  $[\text{M}+\text{H}]^+$   $\text{C}_9\text{H}_{14}^2\text{H}_3\text{ON}^{81}\text{Br}$ : 239.06559 found: 239.06601.

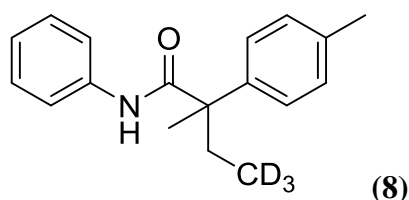

### 2-Methyl-N-phenyl-2-(4-methylphenyl)-[4- $^2\text{H}_3$ ]-butanamide

Prepared according to the method B; the product was obtained as white solid (yield 67%);  $R_f = 0.33$  (petroleum ether/EtOAc = 90/10 v/v).

$^1\text{H}$  NMR (500 MHz,  $\text{CDCl}_3$ )  $\delta$  7.39-7.34 (m, 2H), 7.31-7.24 (m, 4H), 7.20 (d,  $J = 8.0$  Hz, 2H), 7.05 (t,  $J = 7.4$  Hz, 1H), 6.81 (br s, 1H), 2.36 (s, 3H), 2.09 (q,  $J = 13.5$  Hz, 2H), 1.59 ppm (s, 3H).

$^{13}\text{C}$  NMR (126 MHz,  $\text{CDCl}_3$ )  $\delta$  175.66, 140.44, 138.13, 137.08, 129.75 (2C), 129.00 (2C), 127.07 (2C), 124.15, 119.73 (2C), 51.63, 31.35, 23.48, 21.13, 8.16 ppm (quin,  $J = 18.9$  Hz).

FT-IR:  $\tilde{\nu} = 3311, 2932, 1663, 1528, 1498, 1311, 1242, 1071$   $\text{cm}^{-1}$ .

HRMS: calc. for  $[\text{M}+\text{H}]^+$   $\text{C}_{18}\text{H}_{19}^2\text{H}_3\text{ON}$ : 271.18842 found: 271.18797.

### References:

- [1] a) Mu, X.; Wu, T.; Wang, H.-y.; Guo, Y.-l.; Liu, G. *J. Am. Chem. Soc.* **2011**, *134*, 878-881; b) Pigge, F. C.; Dhanya, R. and Hoefgen, Erik R. *Angew. Chem. Int. Ed.* **2007**, *46*, 2887-2890; c) Friesen, R. W.; Trimble, L. A., *Can. J. Chem.* **2004**, *82*, 206-214; d) Liu, Q.; Zhu, F.-P.; Jin, X.-L.; Wang, X.-J.; Chen, H. and Wu, L.-Z. *Chem. Eur. J.* **2015**, *21*, 10326-10329; e) Wang, S.; Huang, X.; Wen, Y.; Ge, Z.; Wang, X.; Li, R. *Tetrahedron*, **2015**, *71*, 8117-8122.



# Copies of spectra

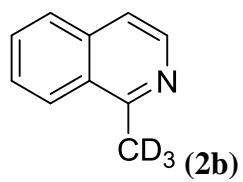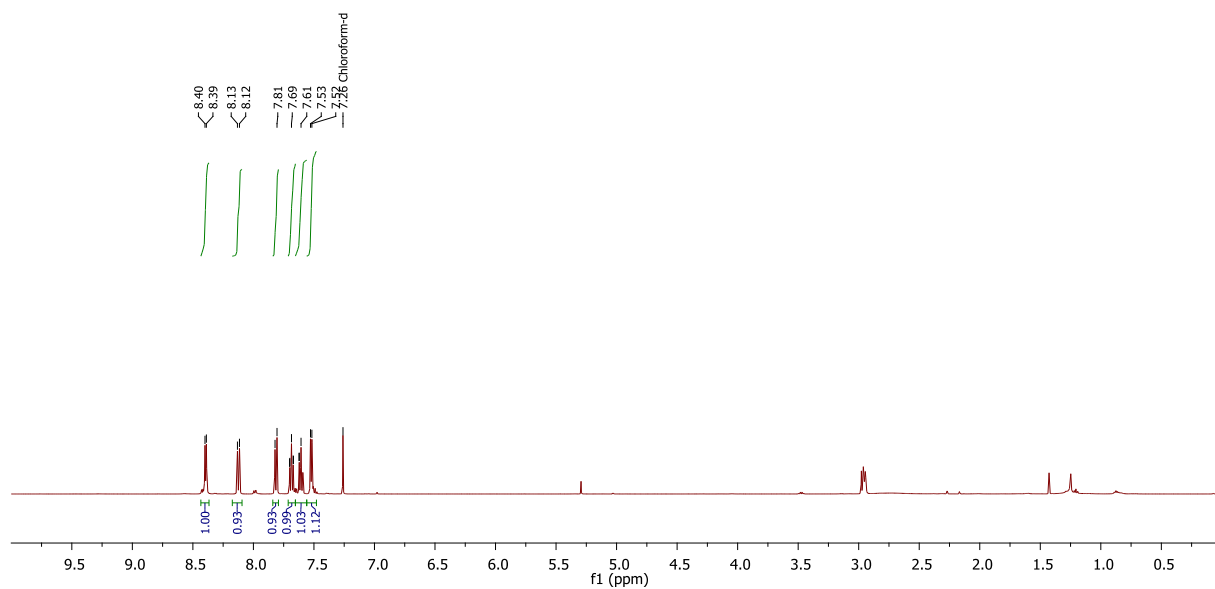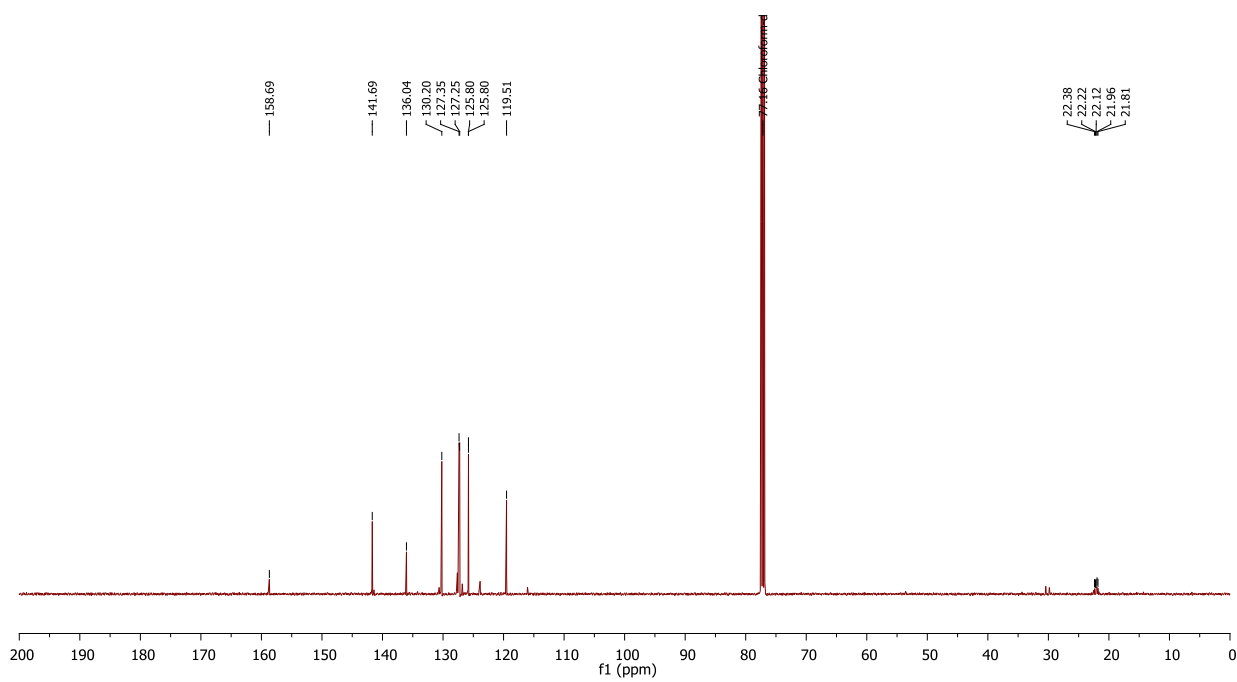

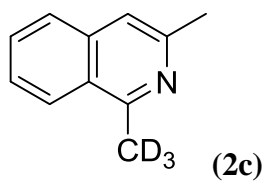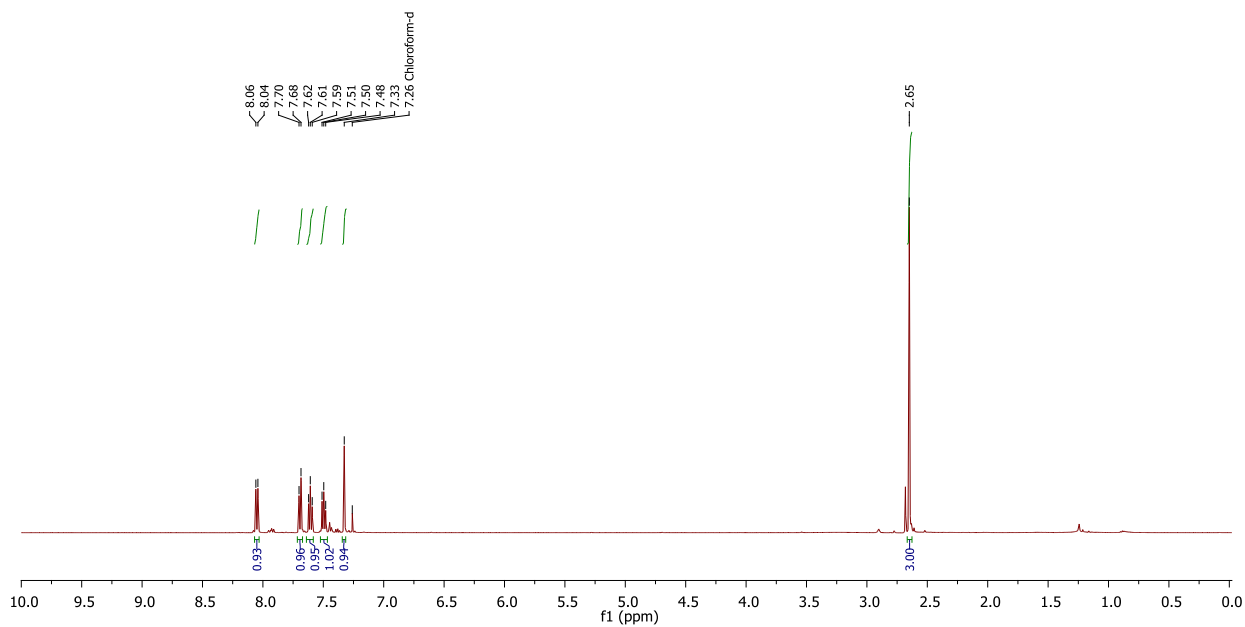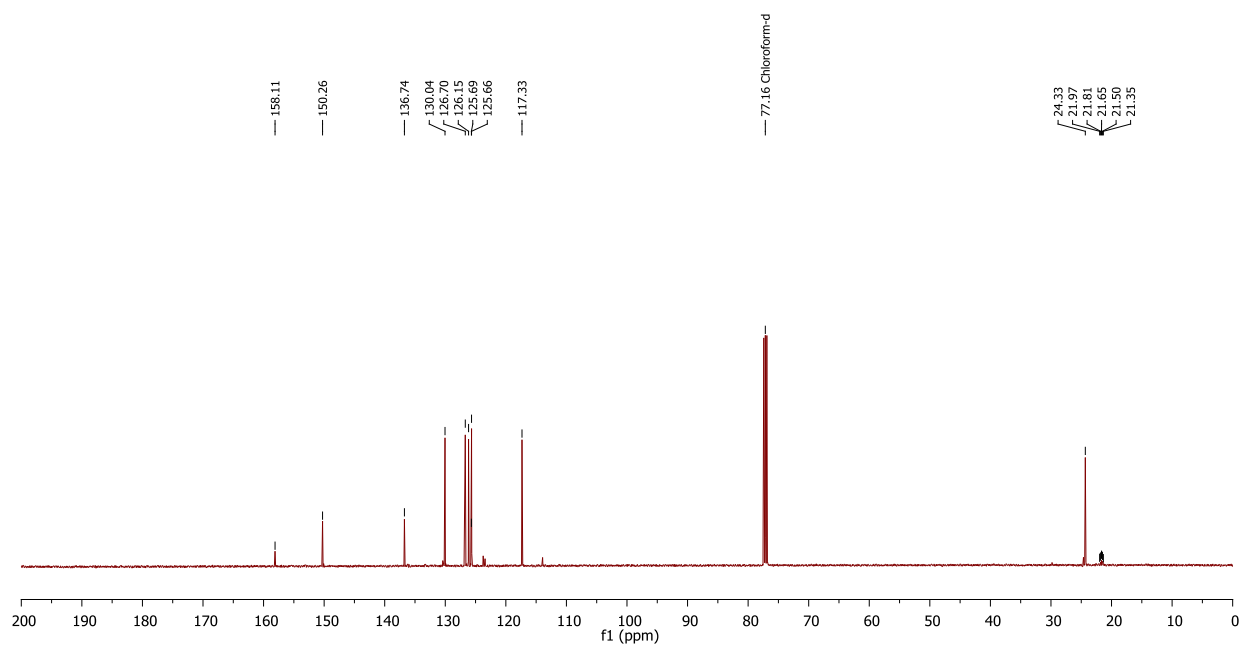

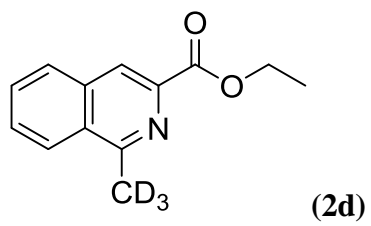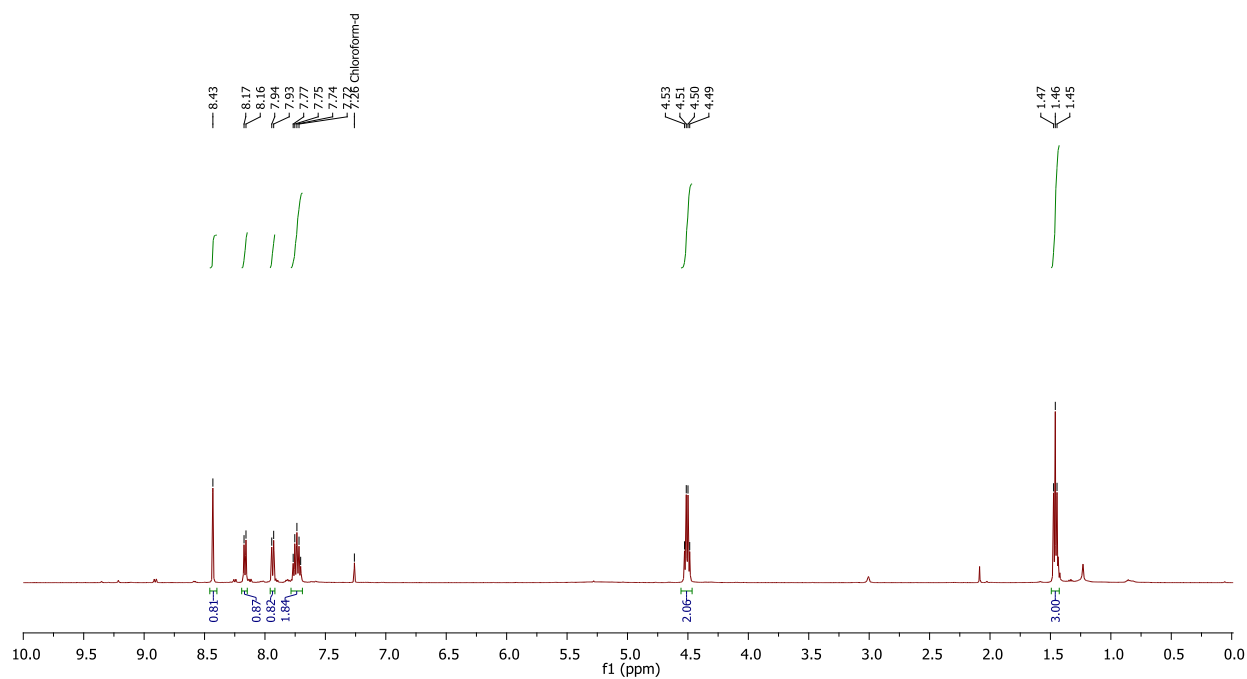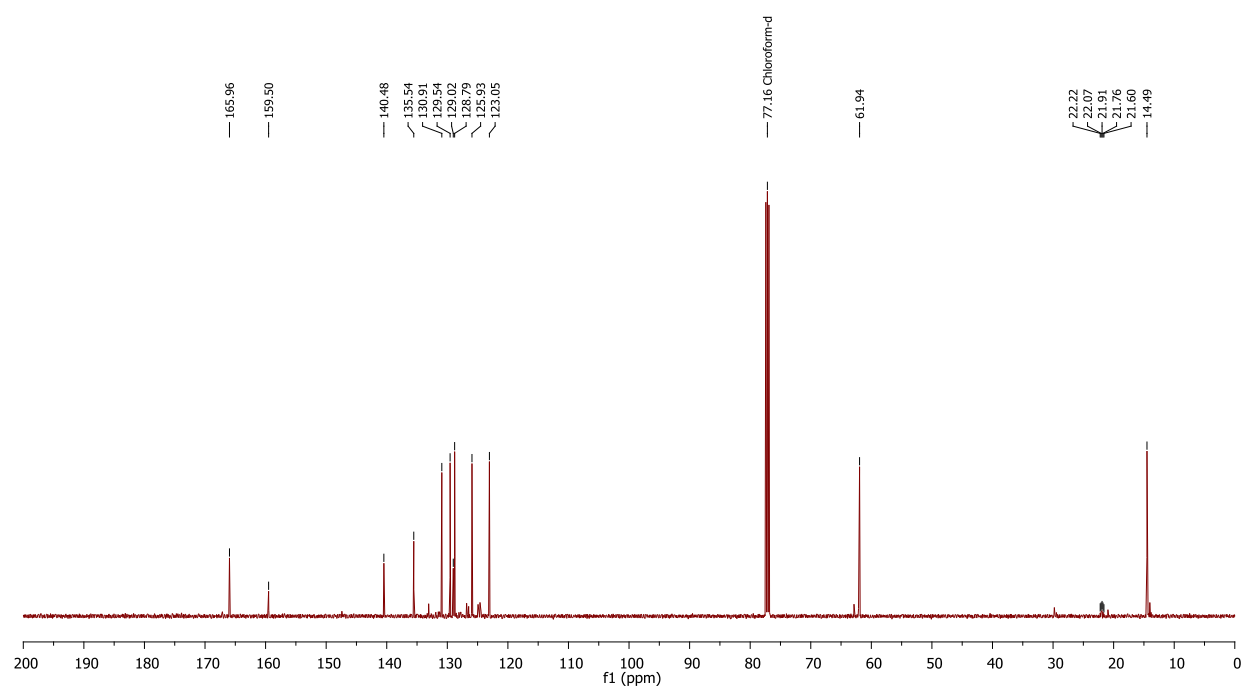

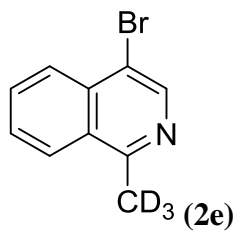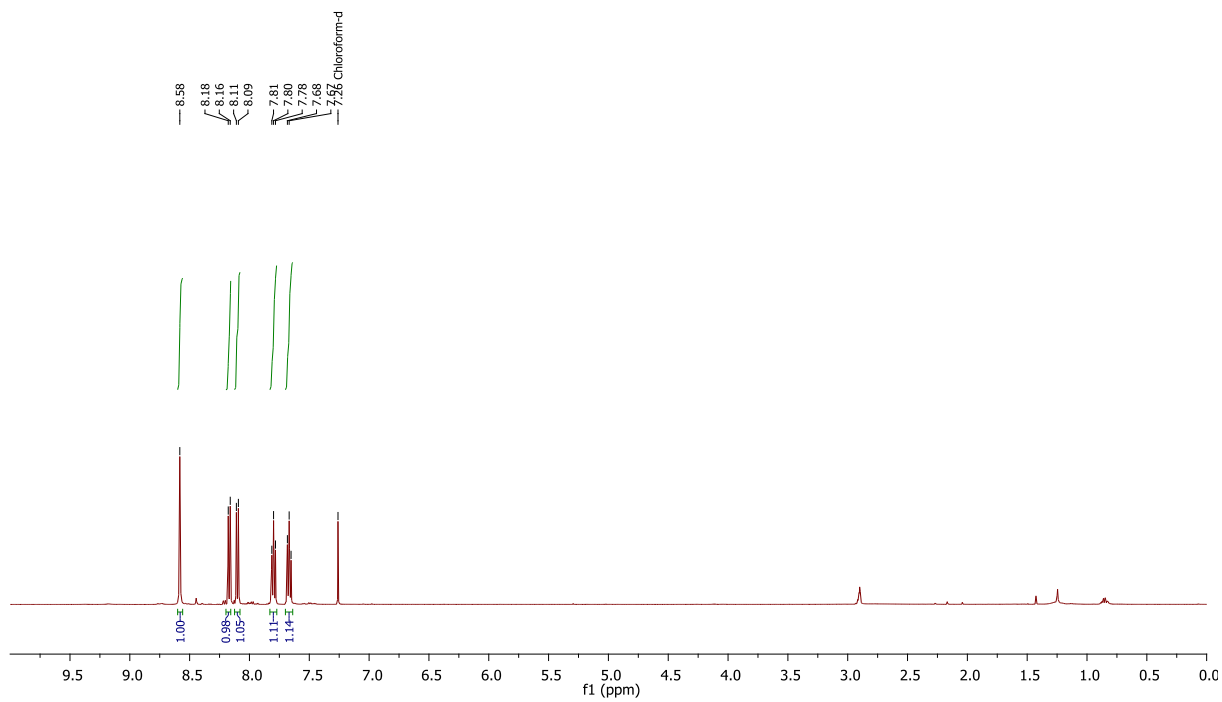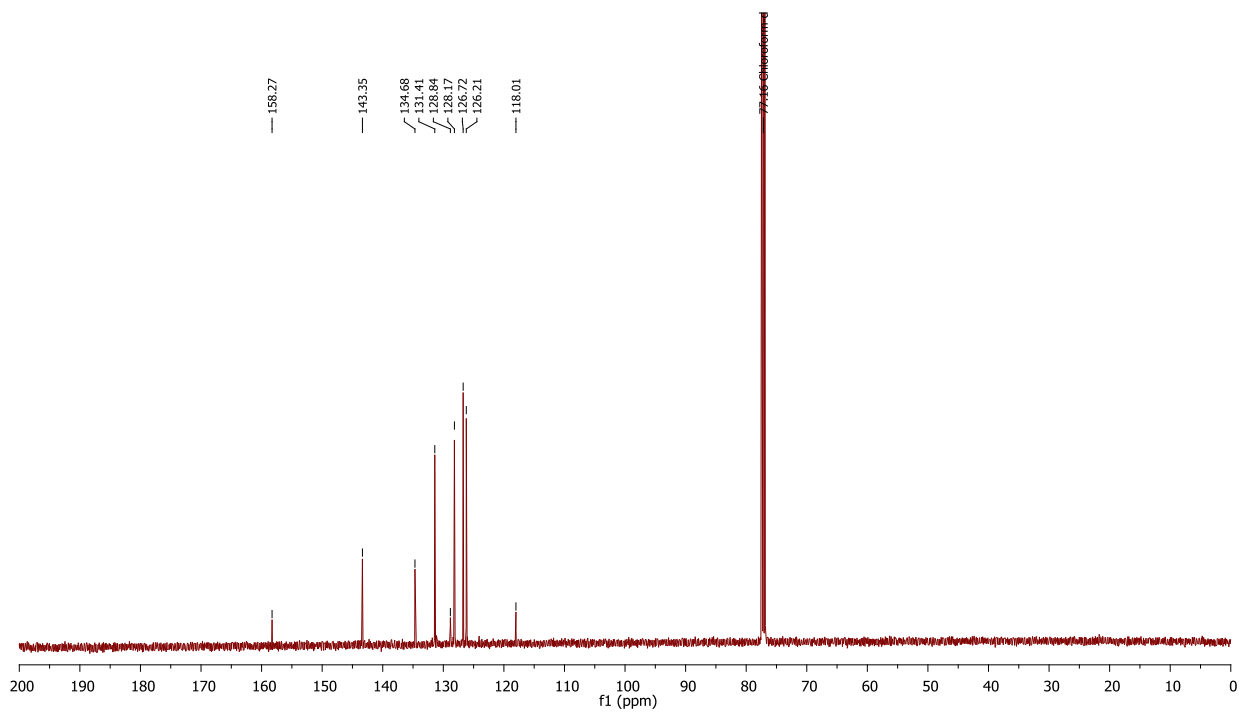

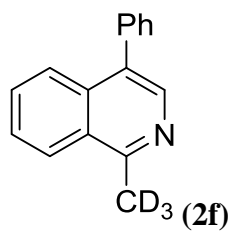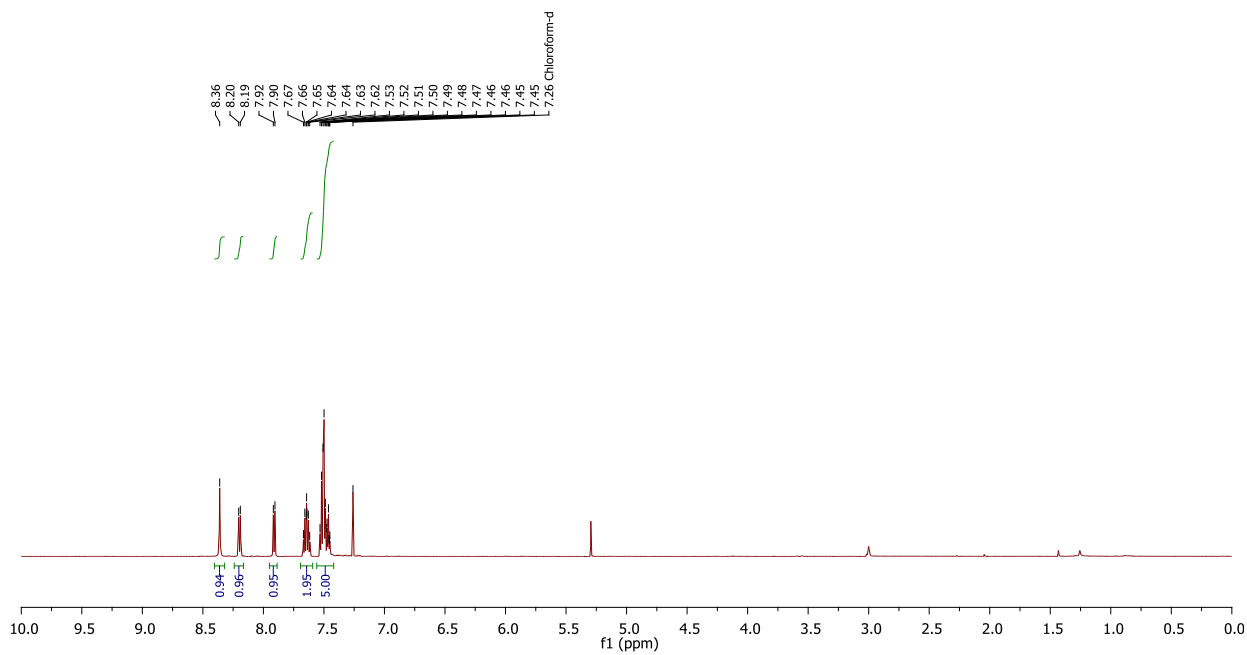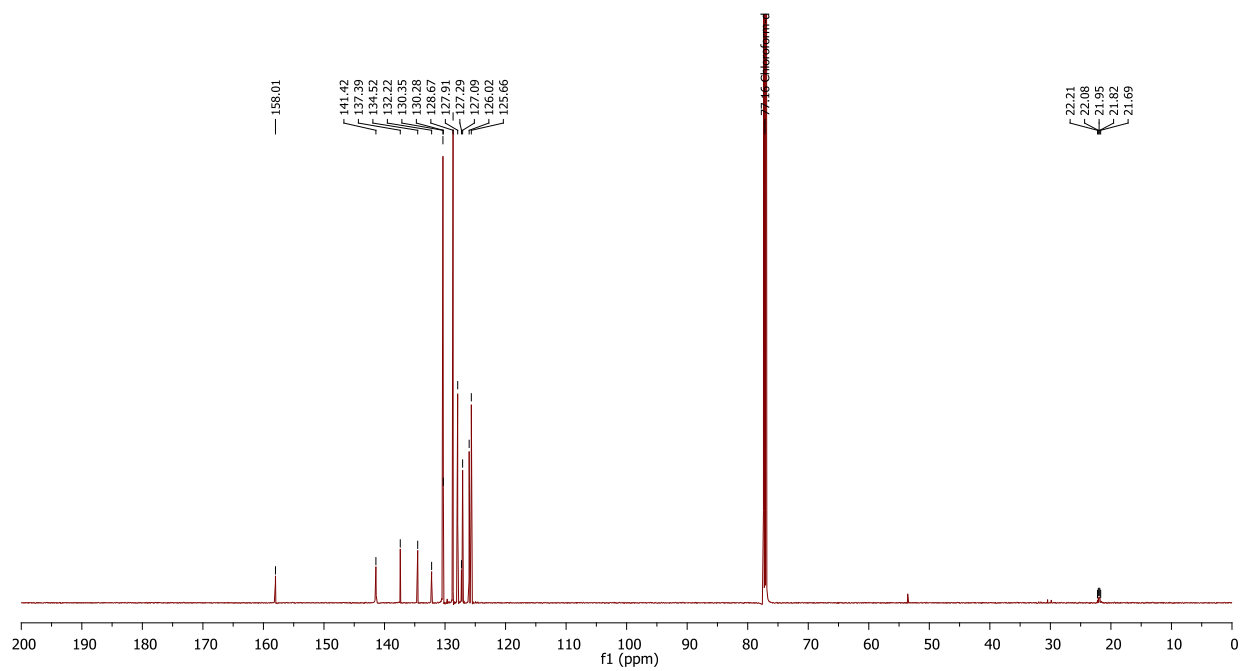

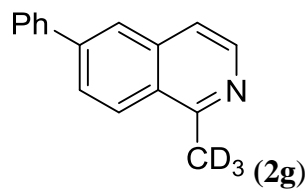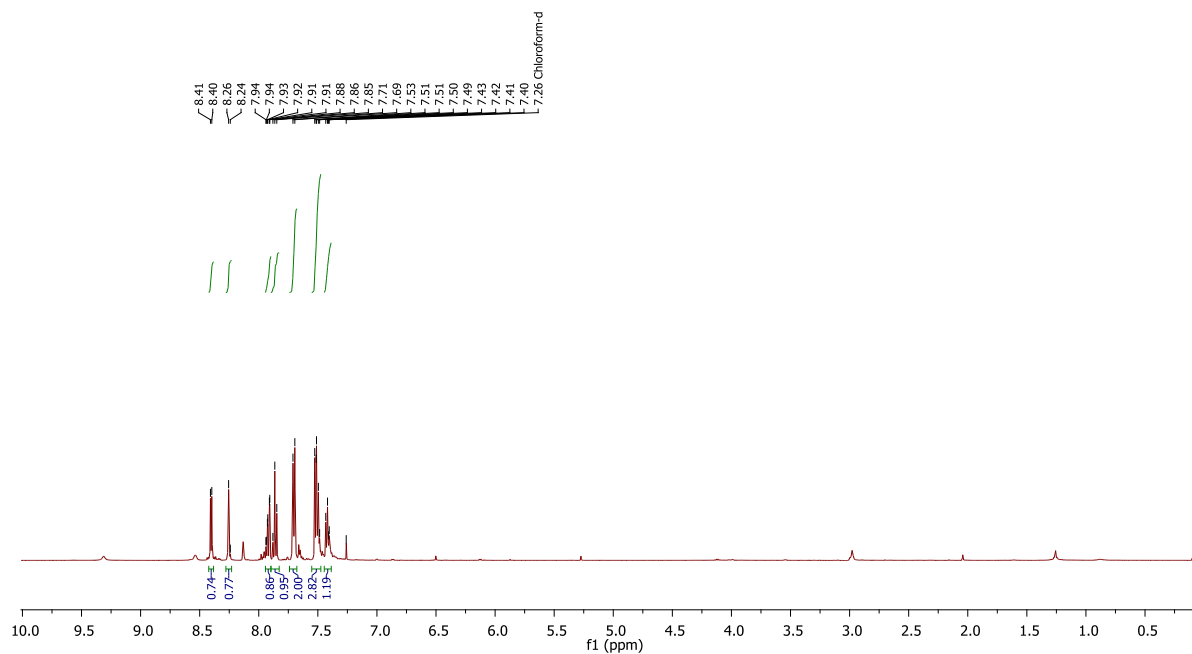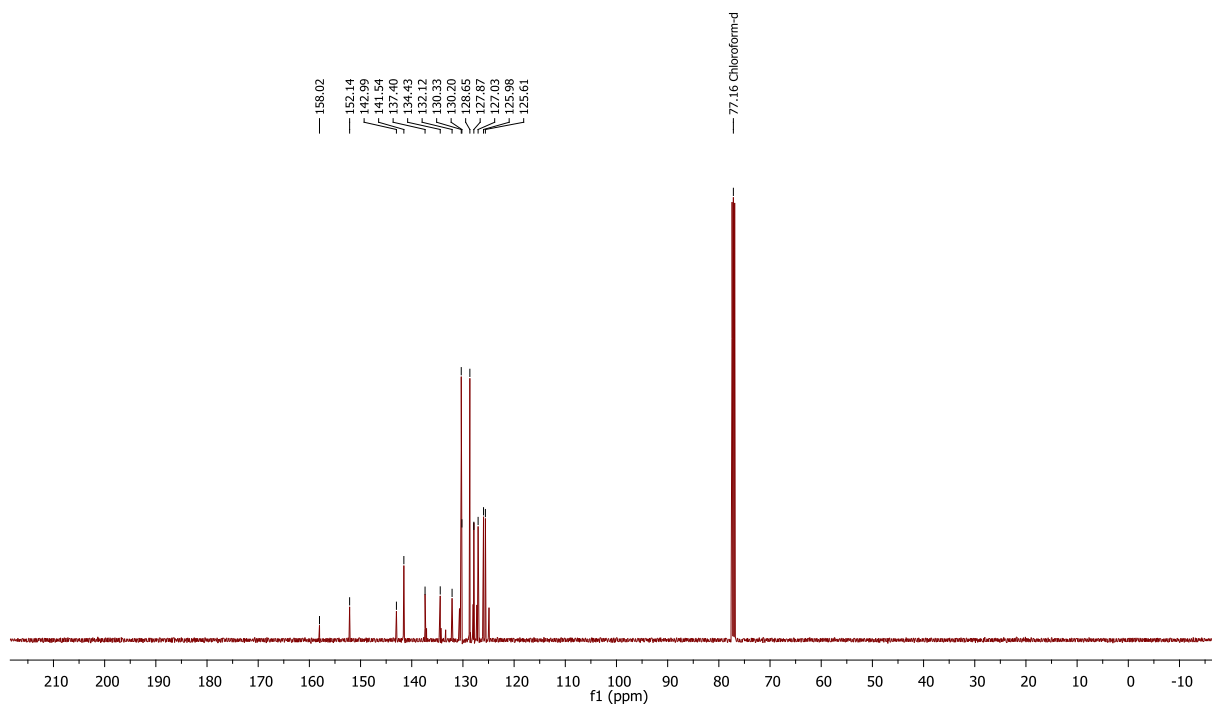

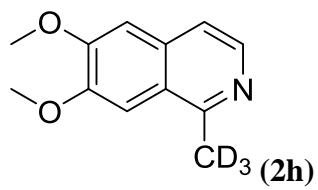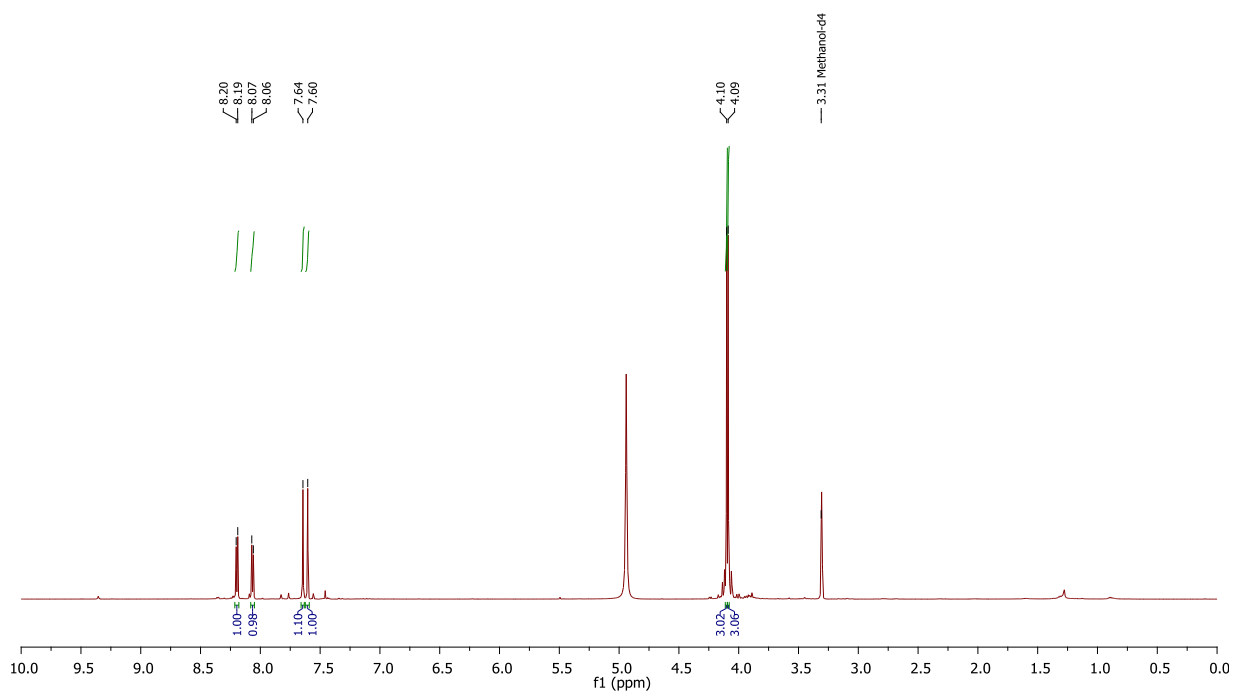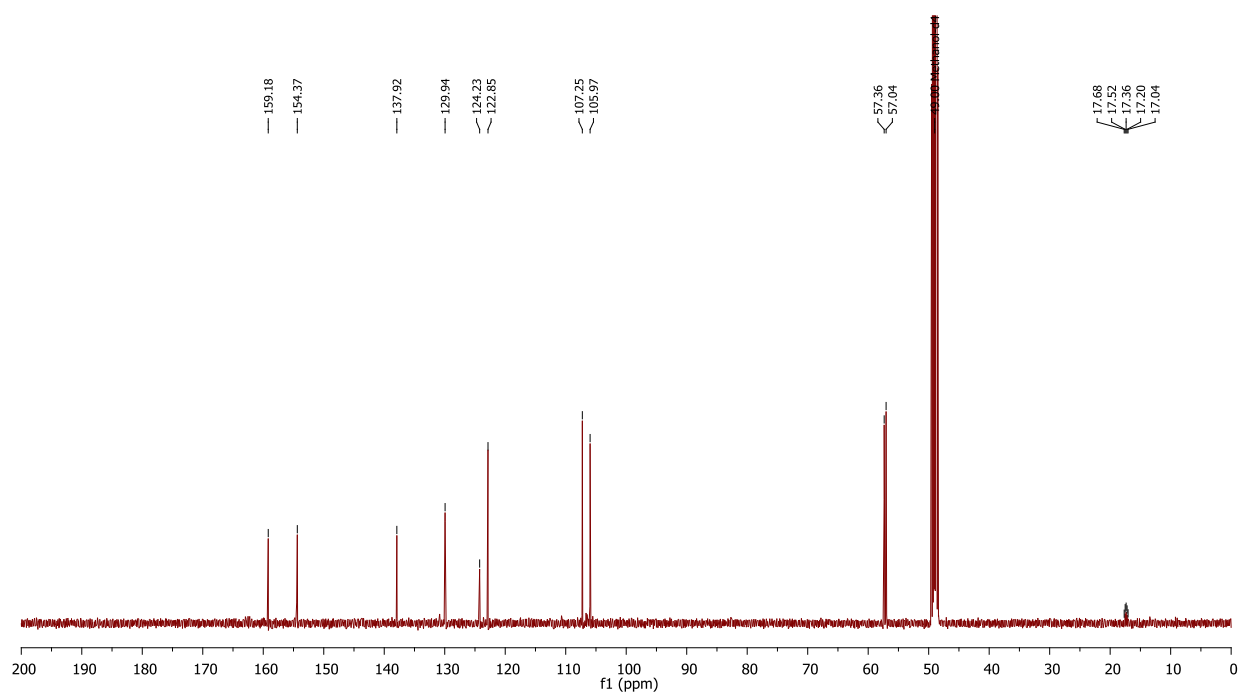

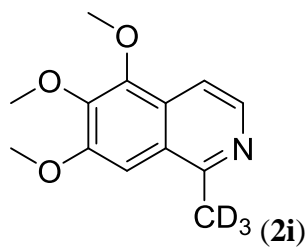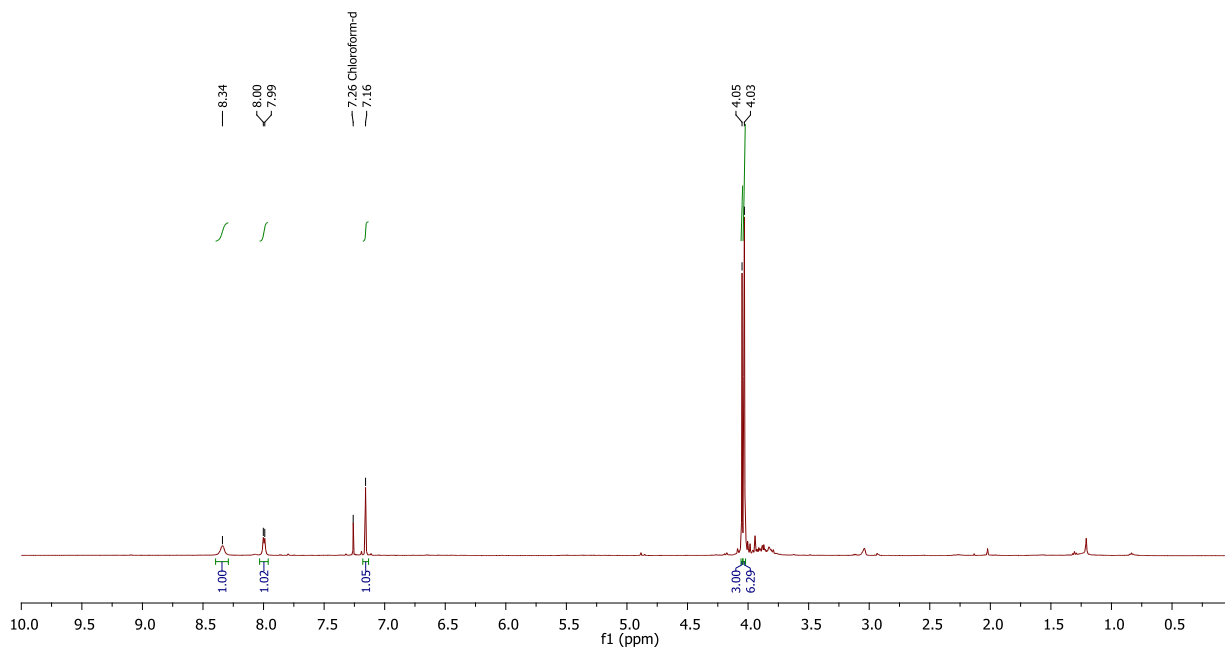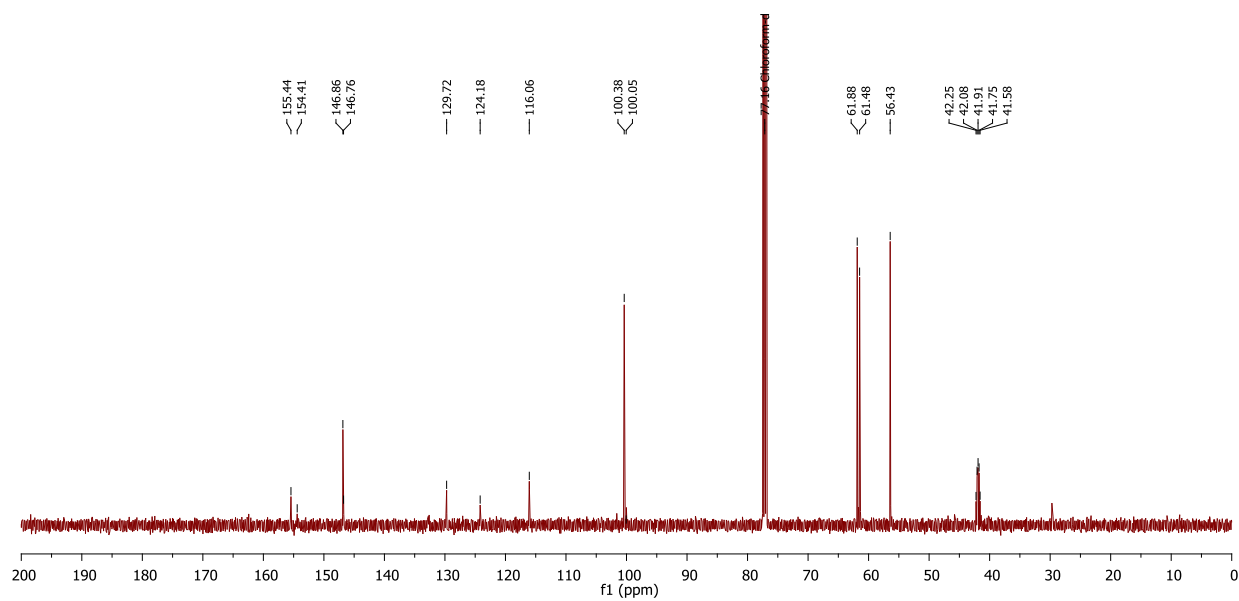



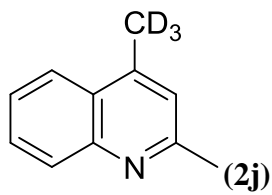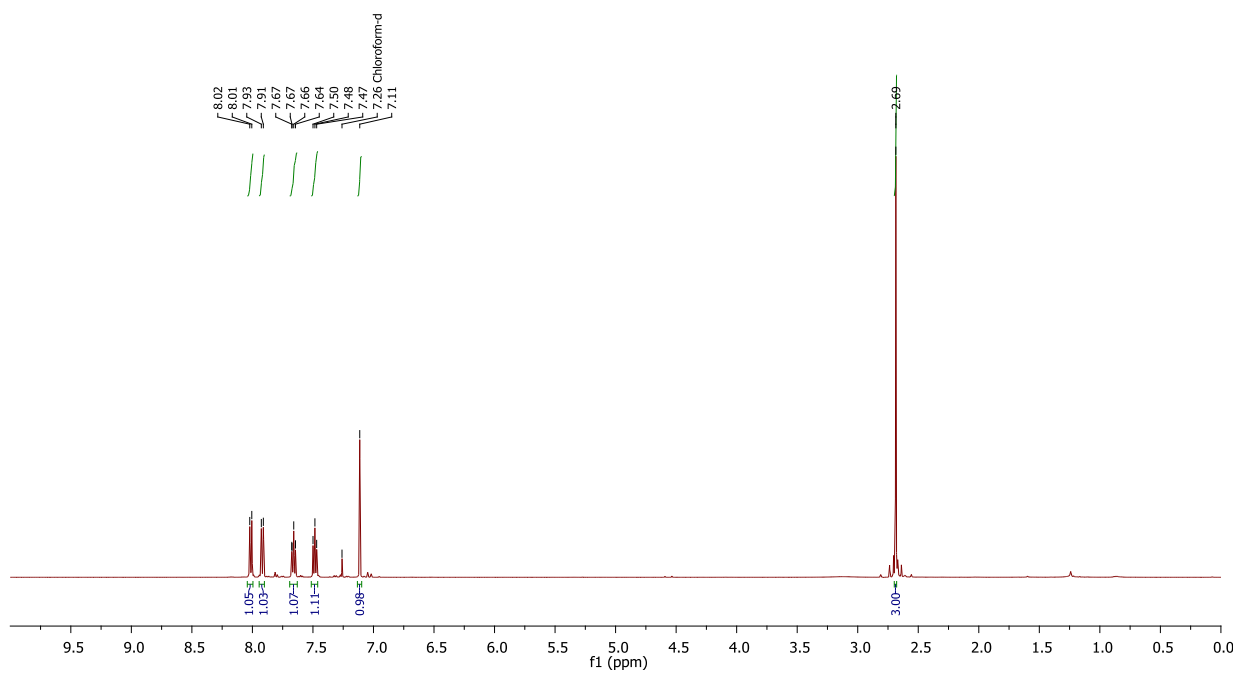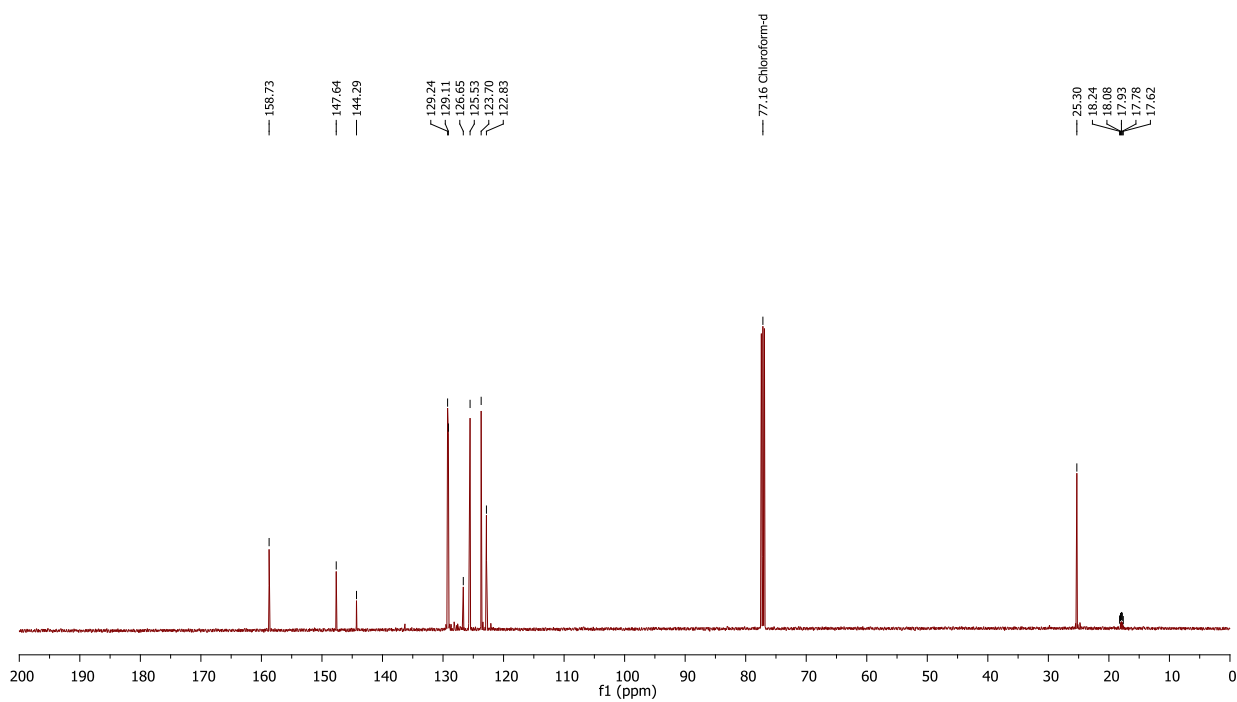

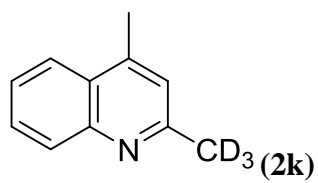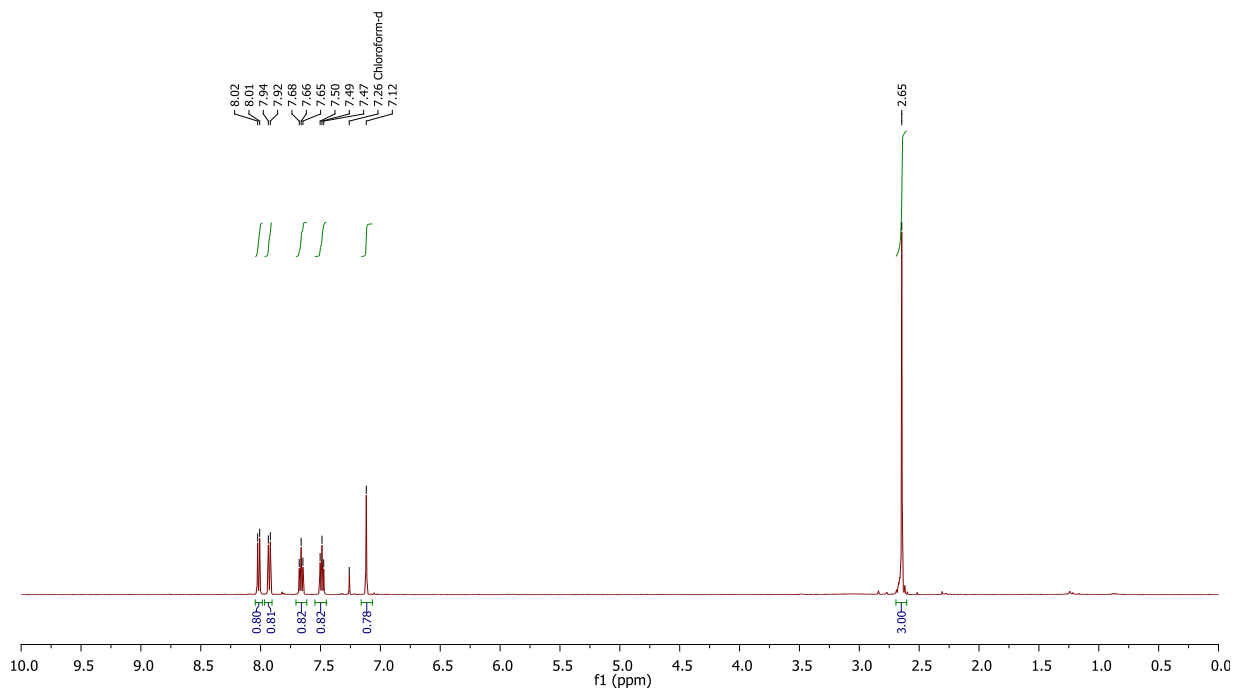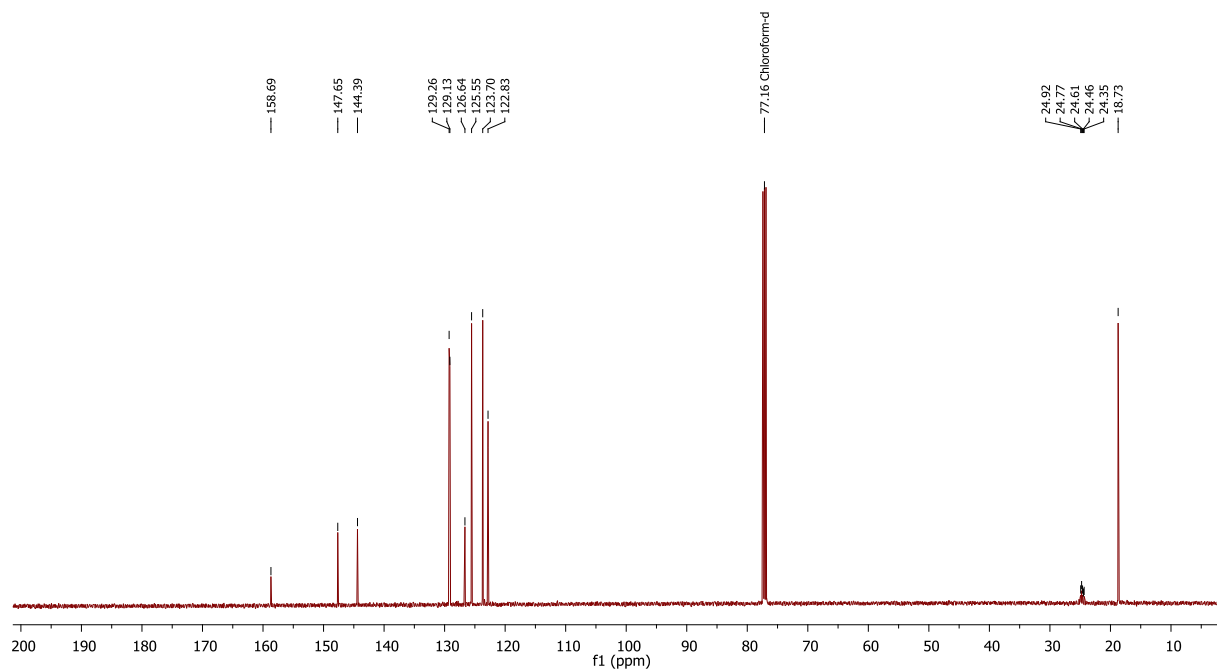

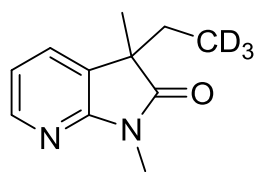

(4a)

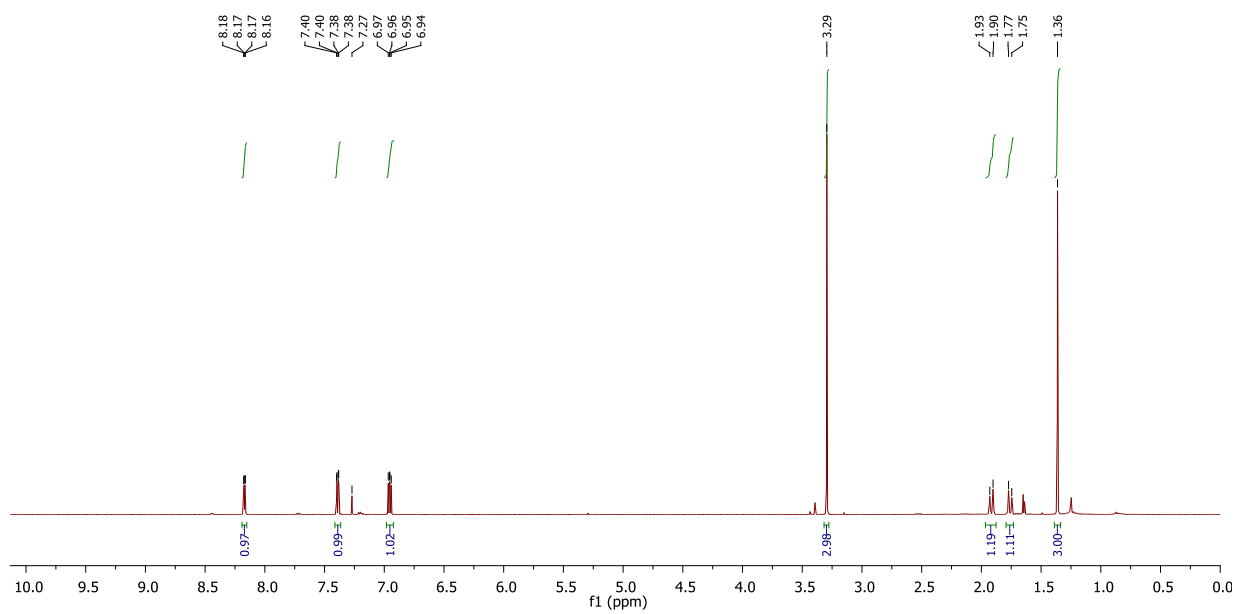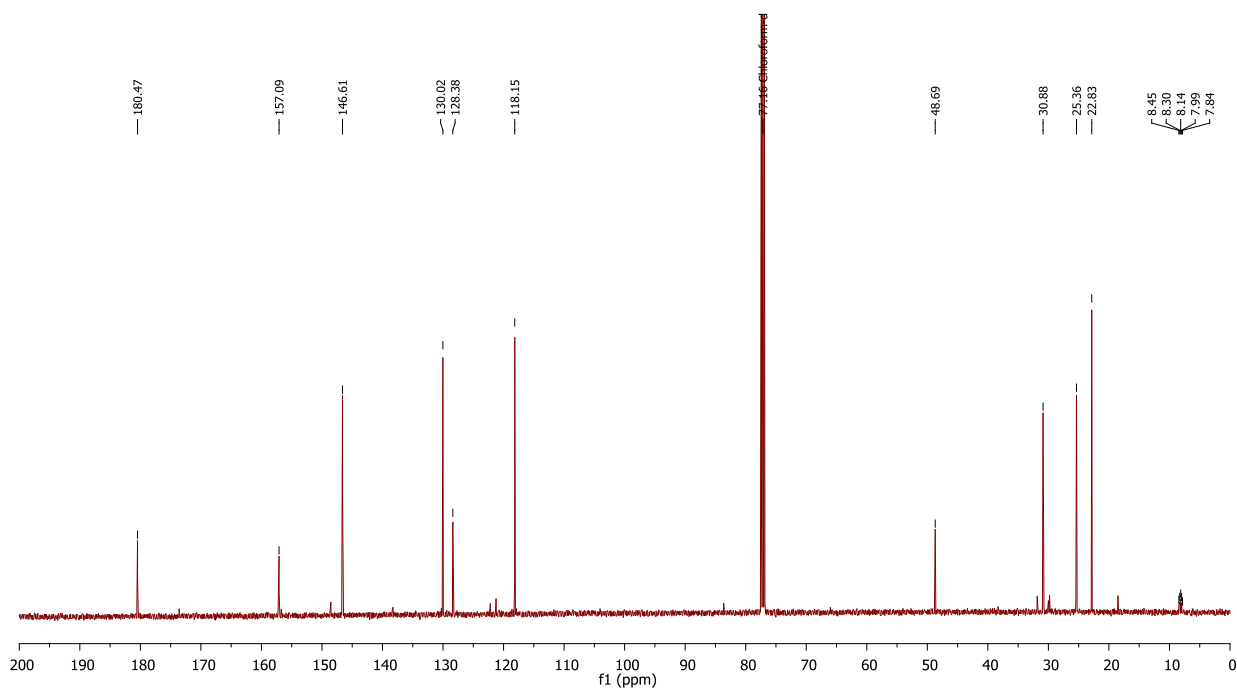

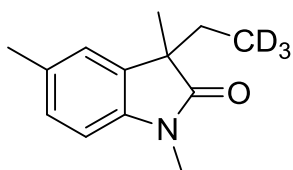

(4b)

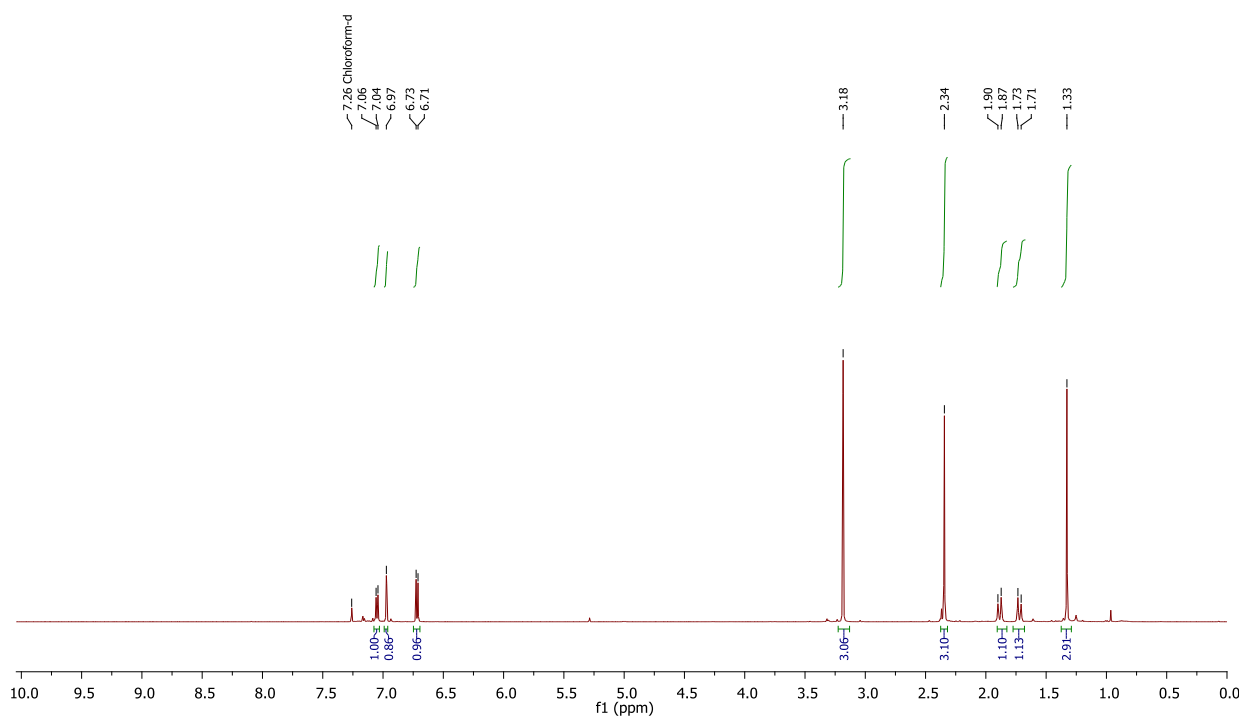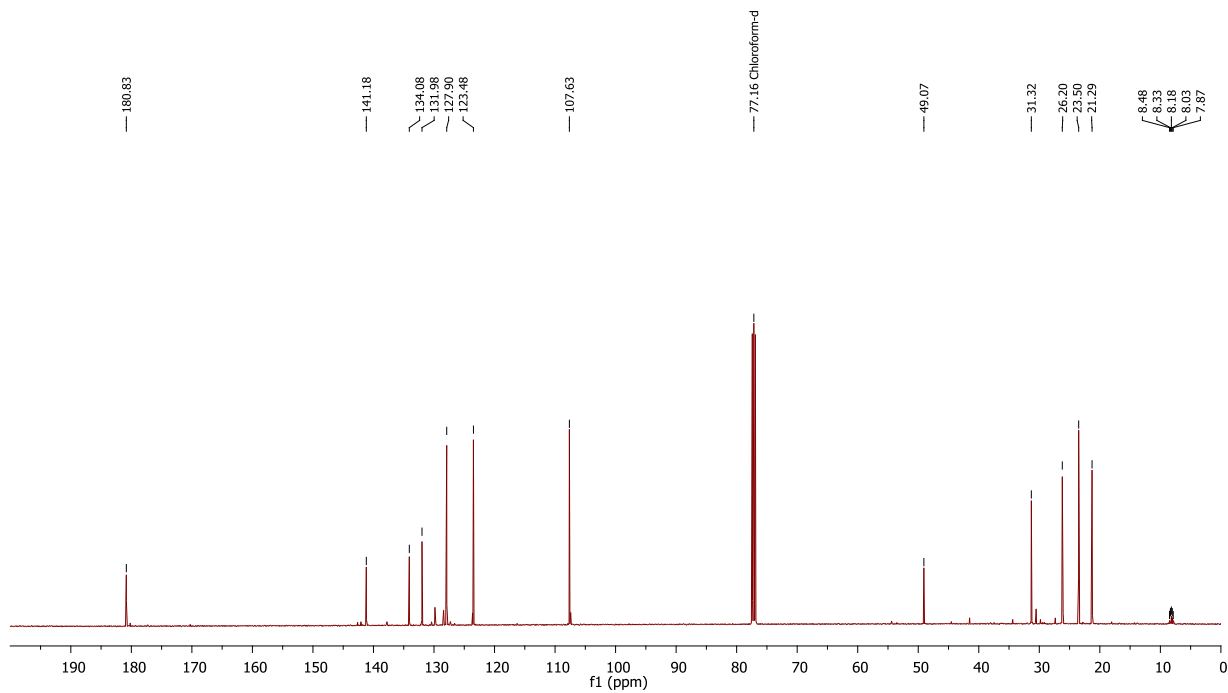

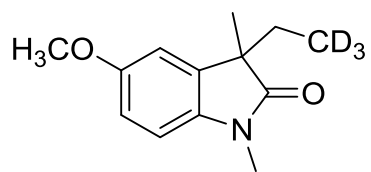

(4c)

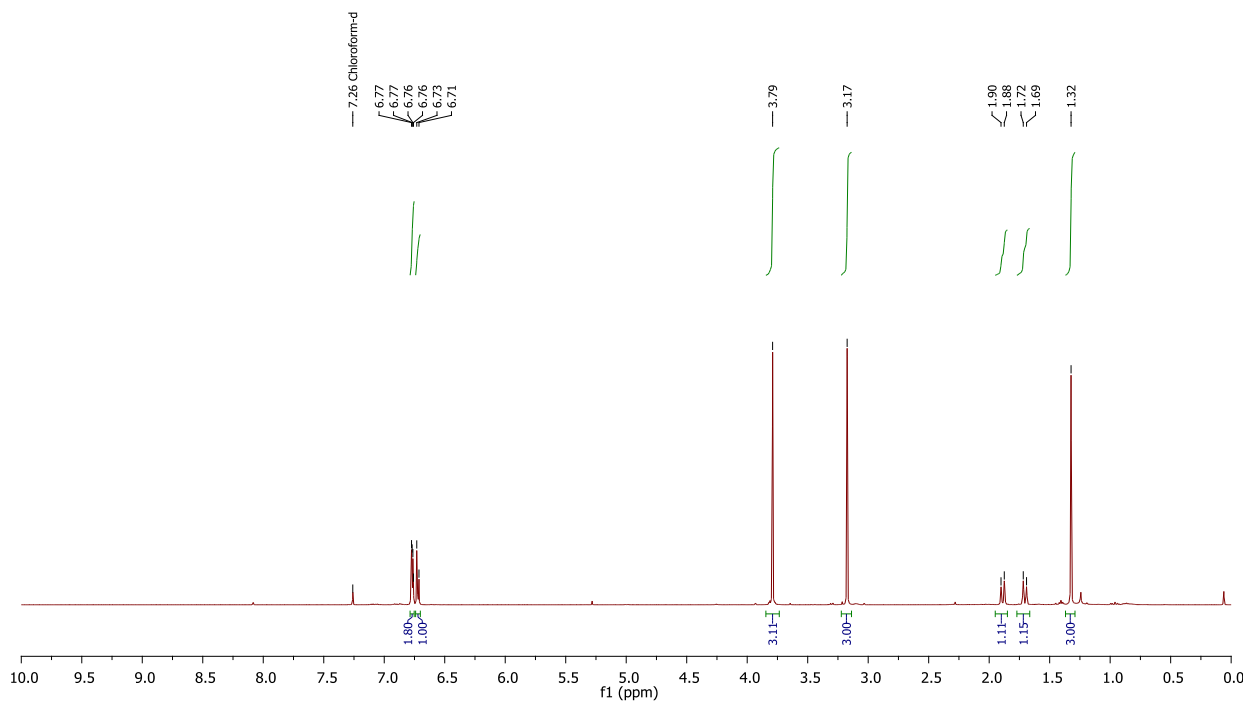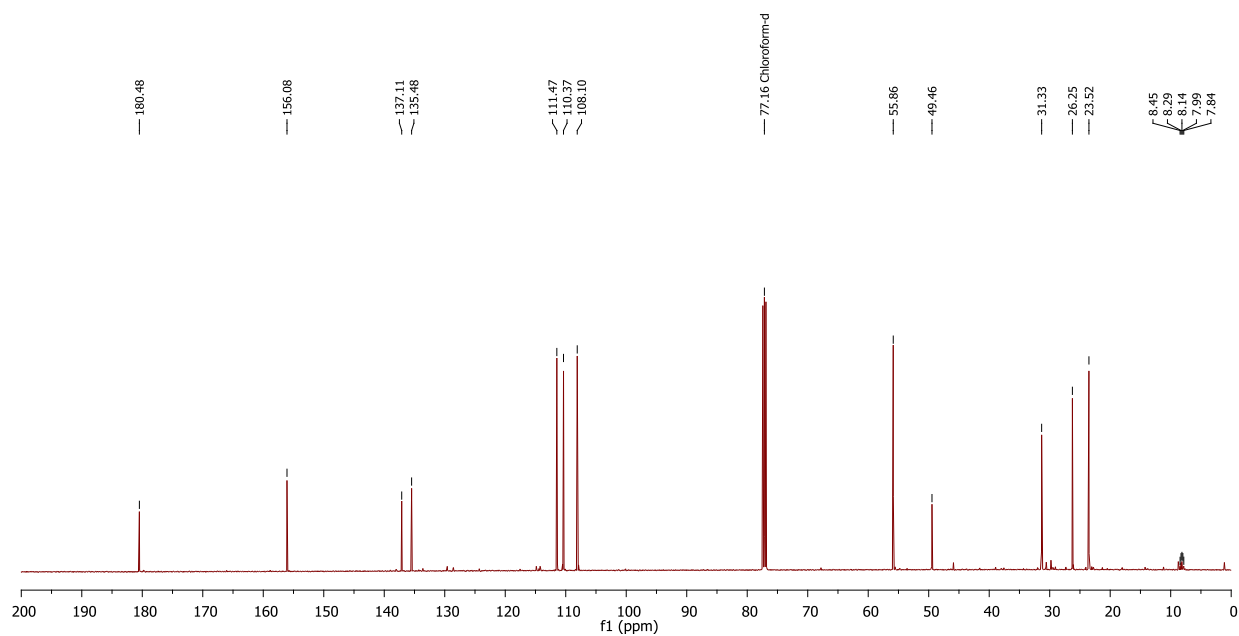

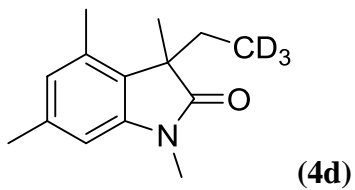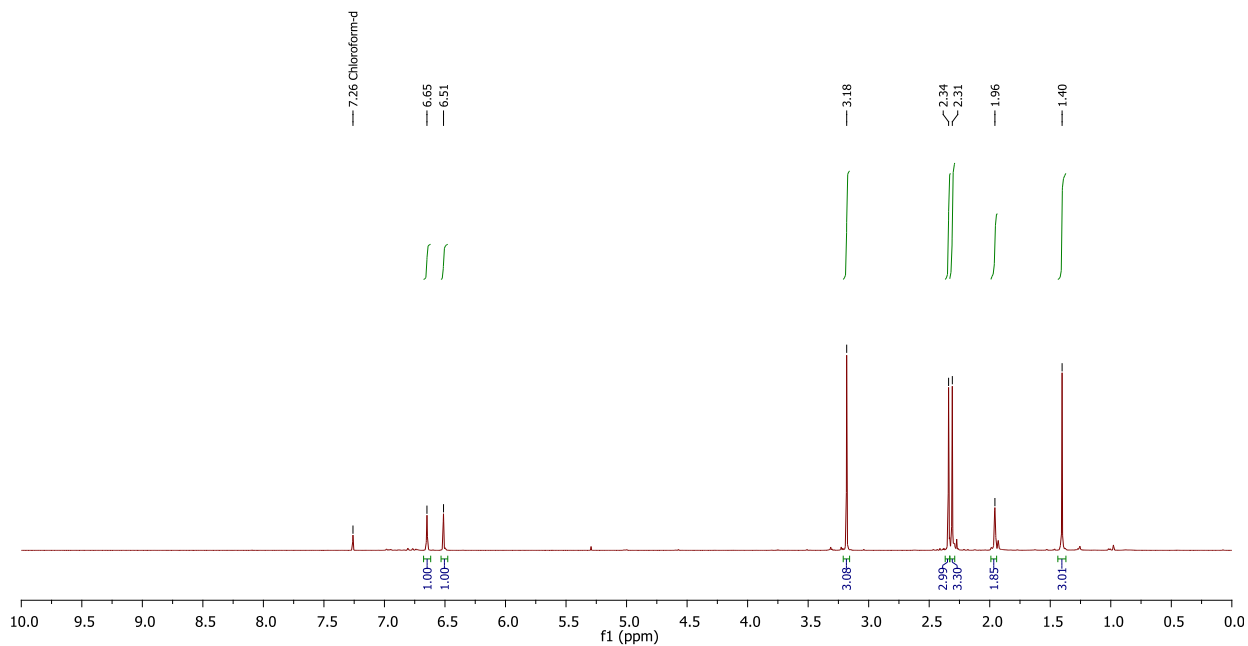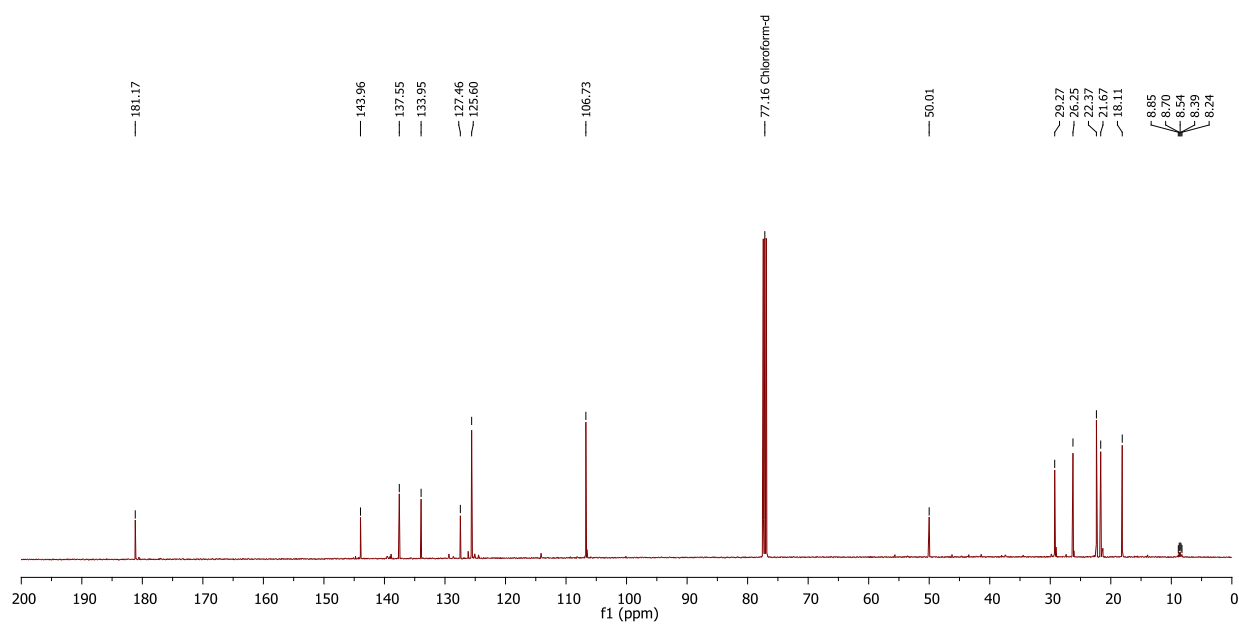

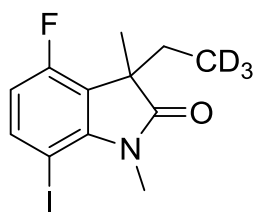

(4e)

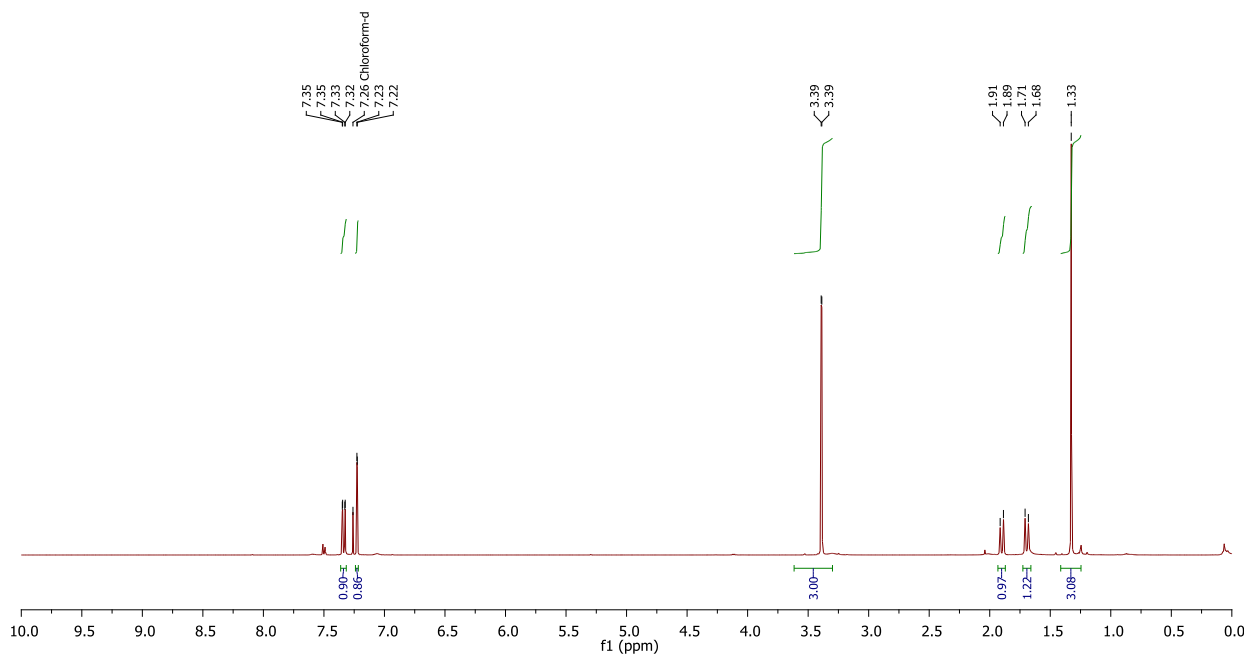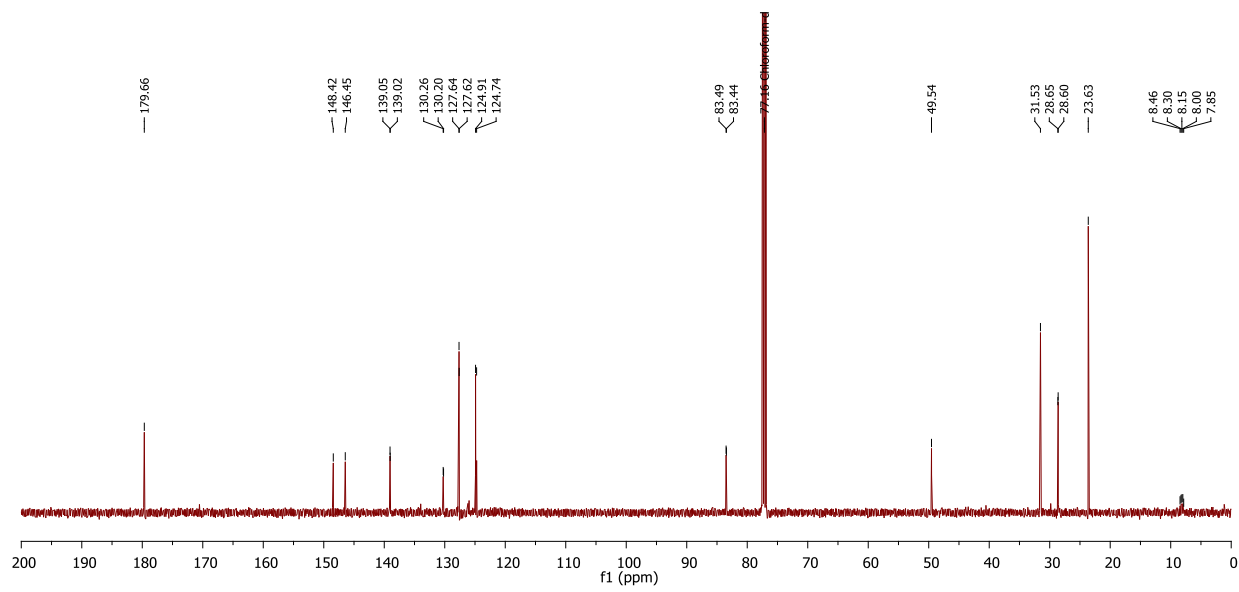

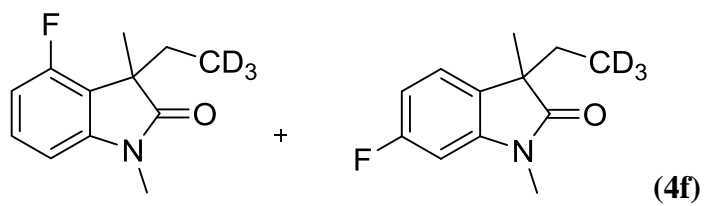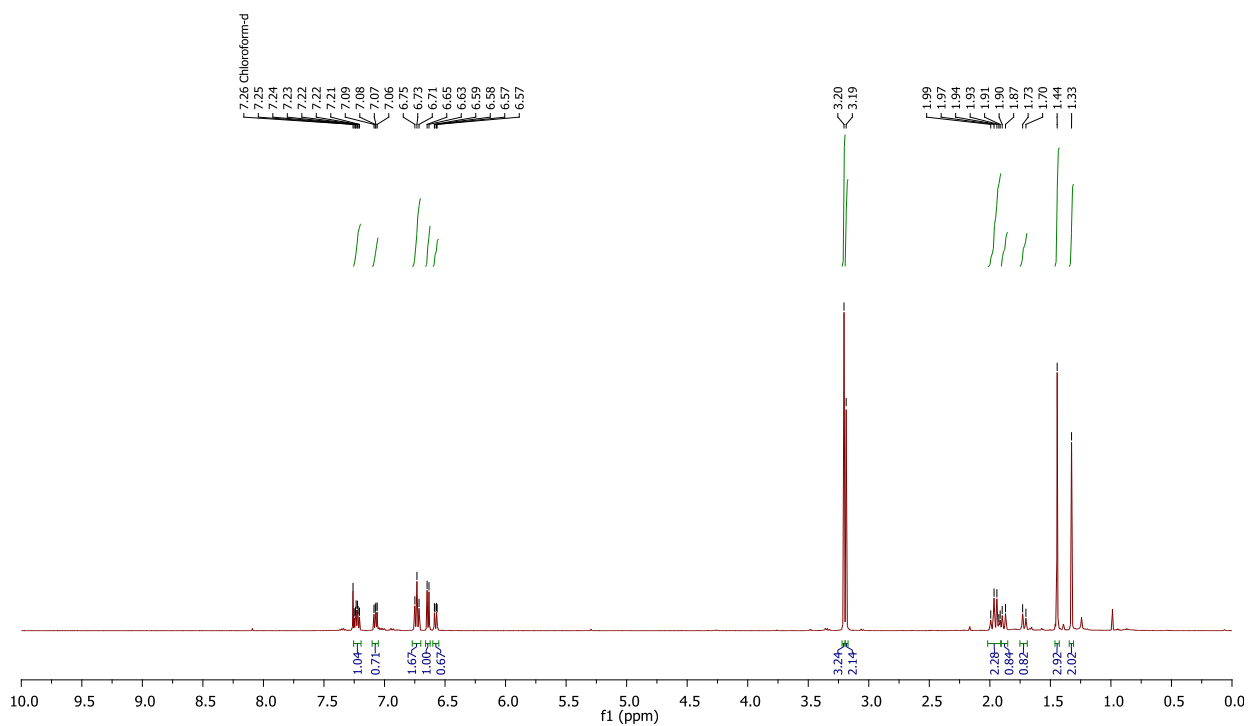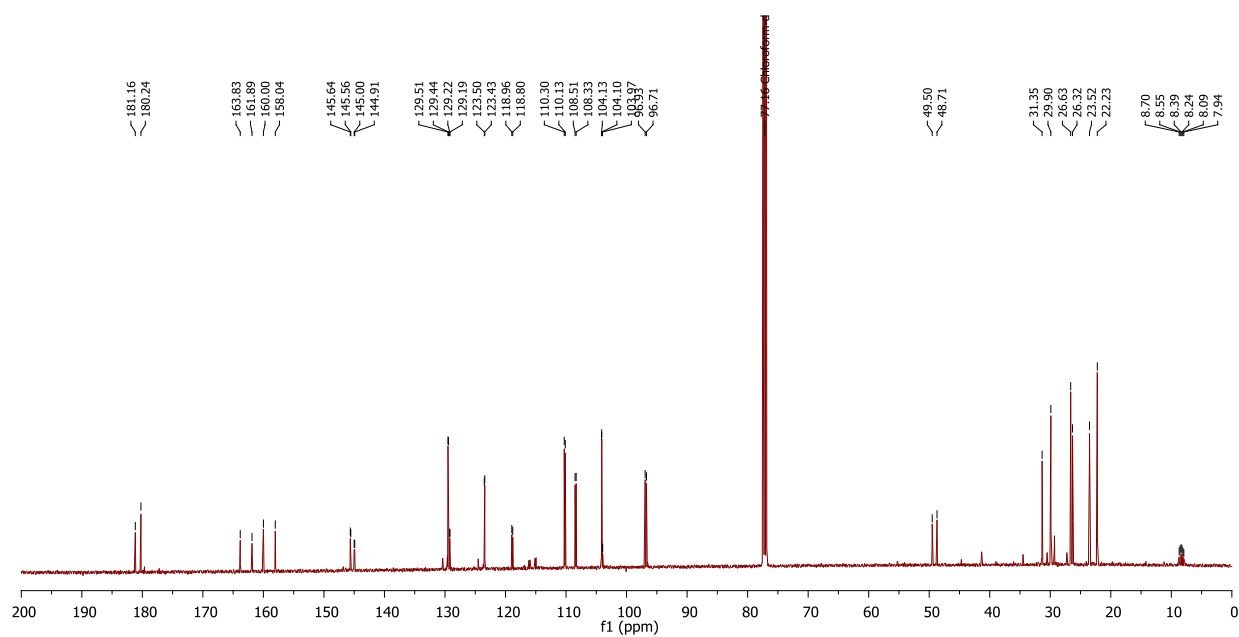



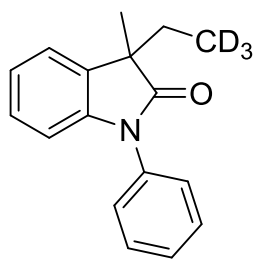

(4g)

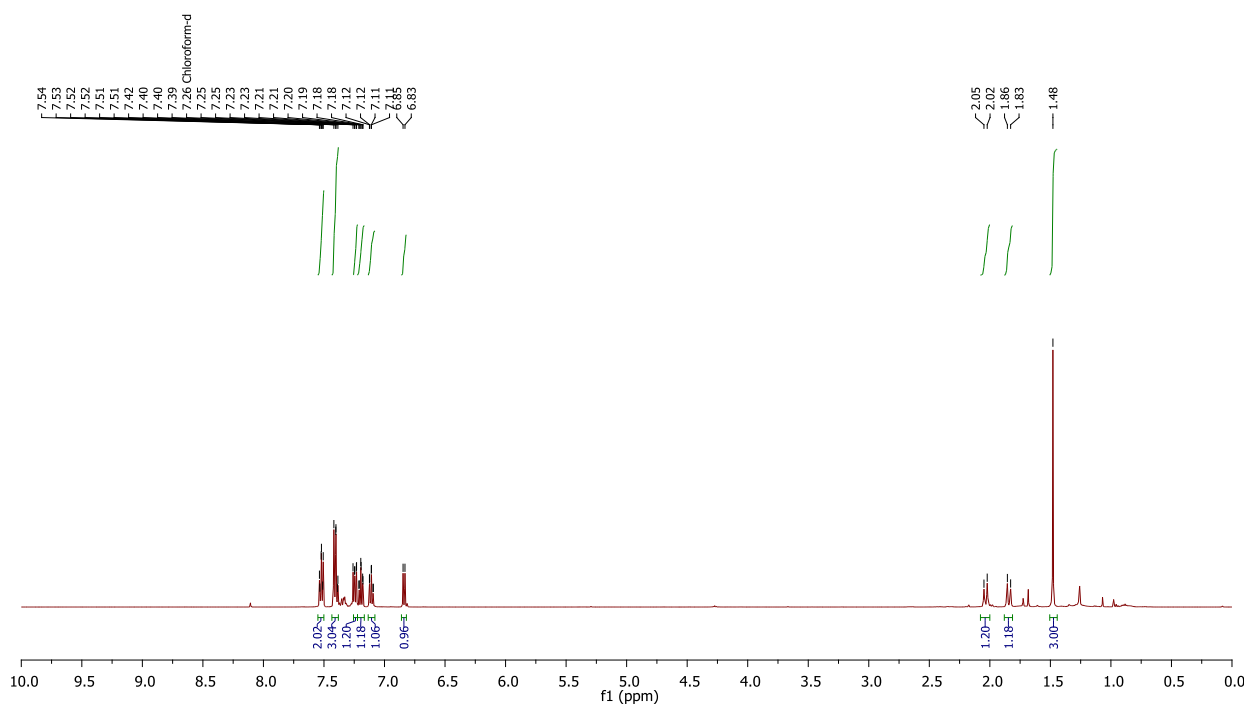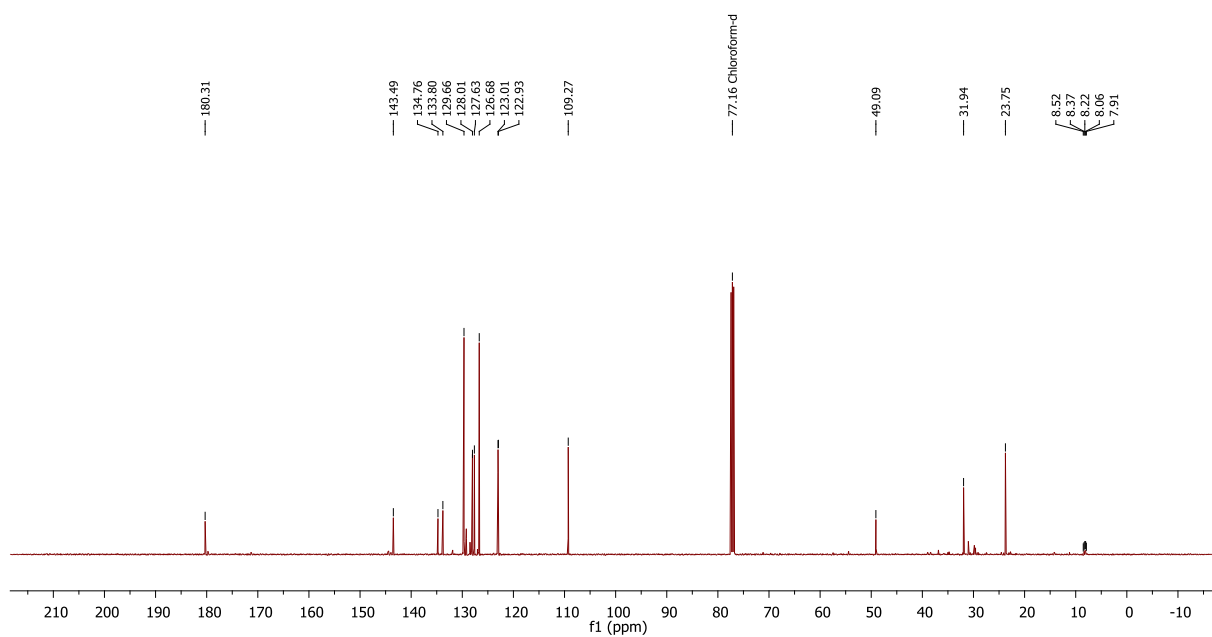

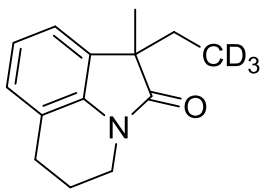

(4h)

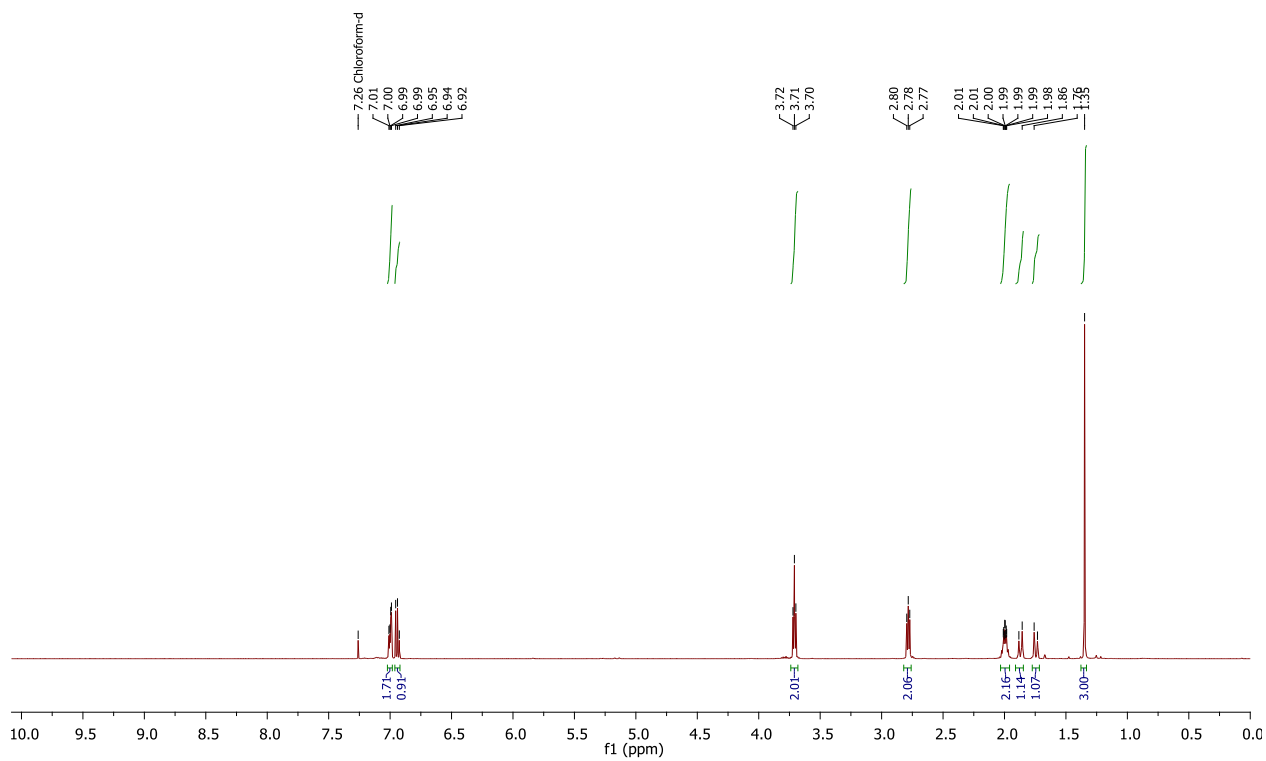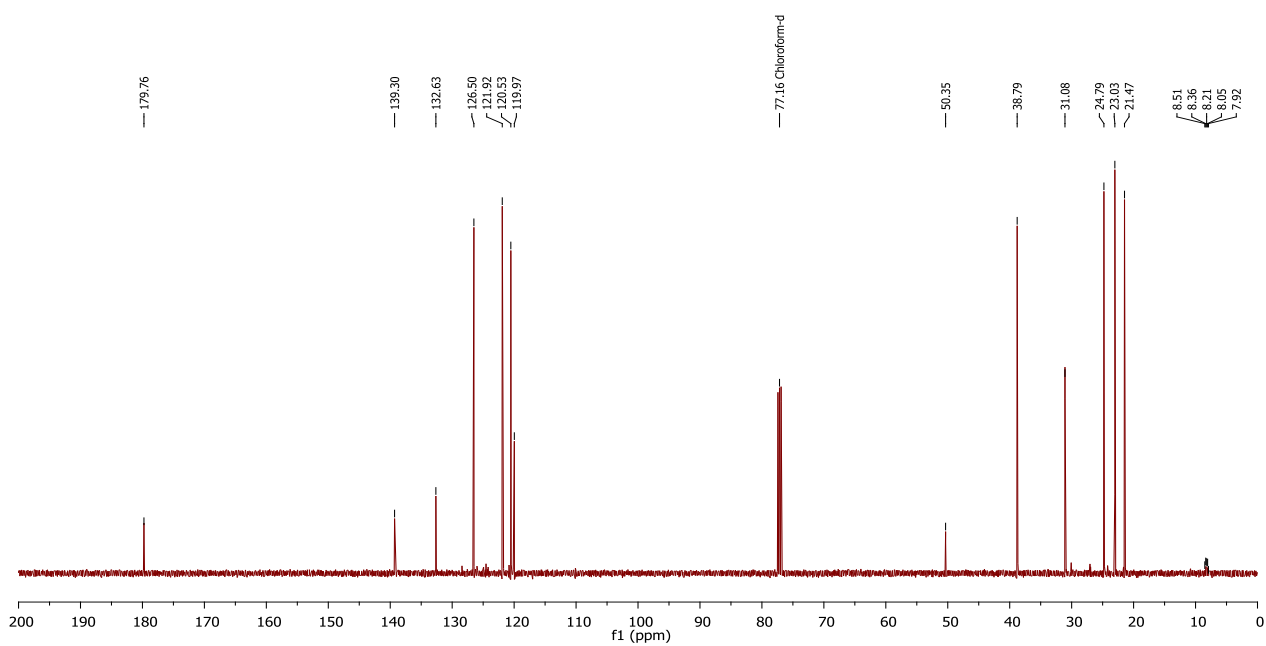

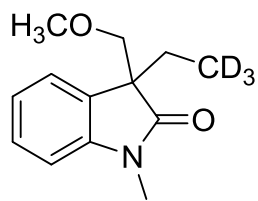

(4i)

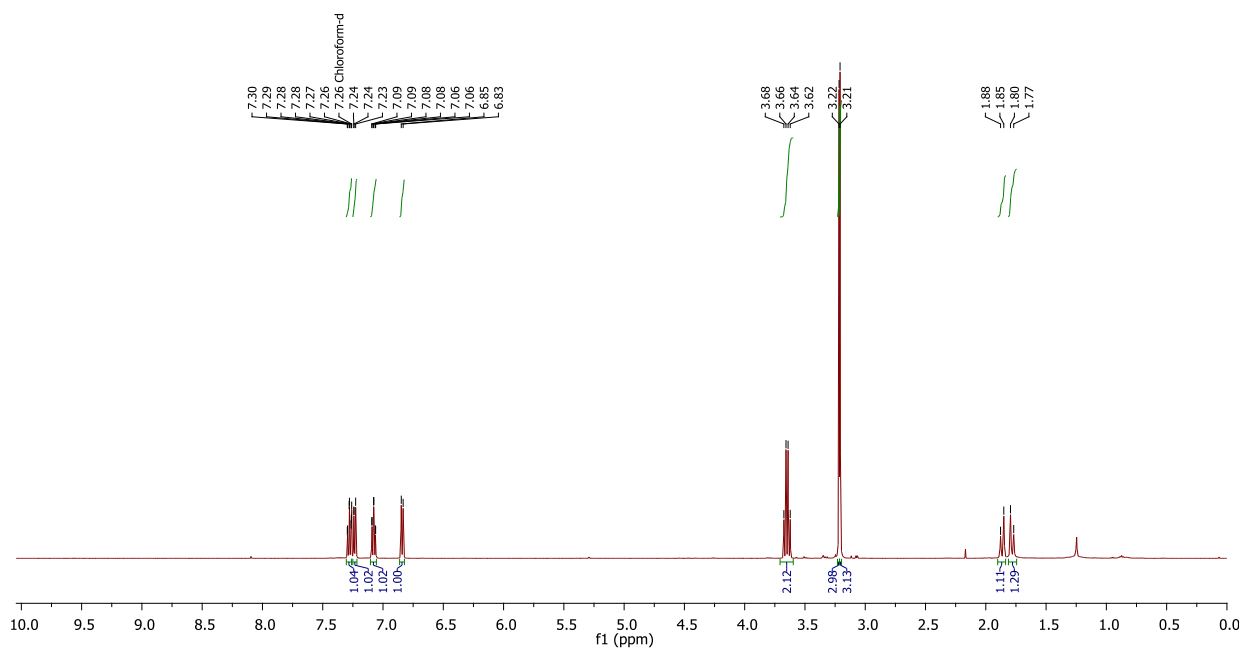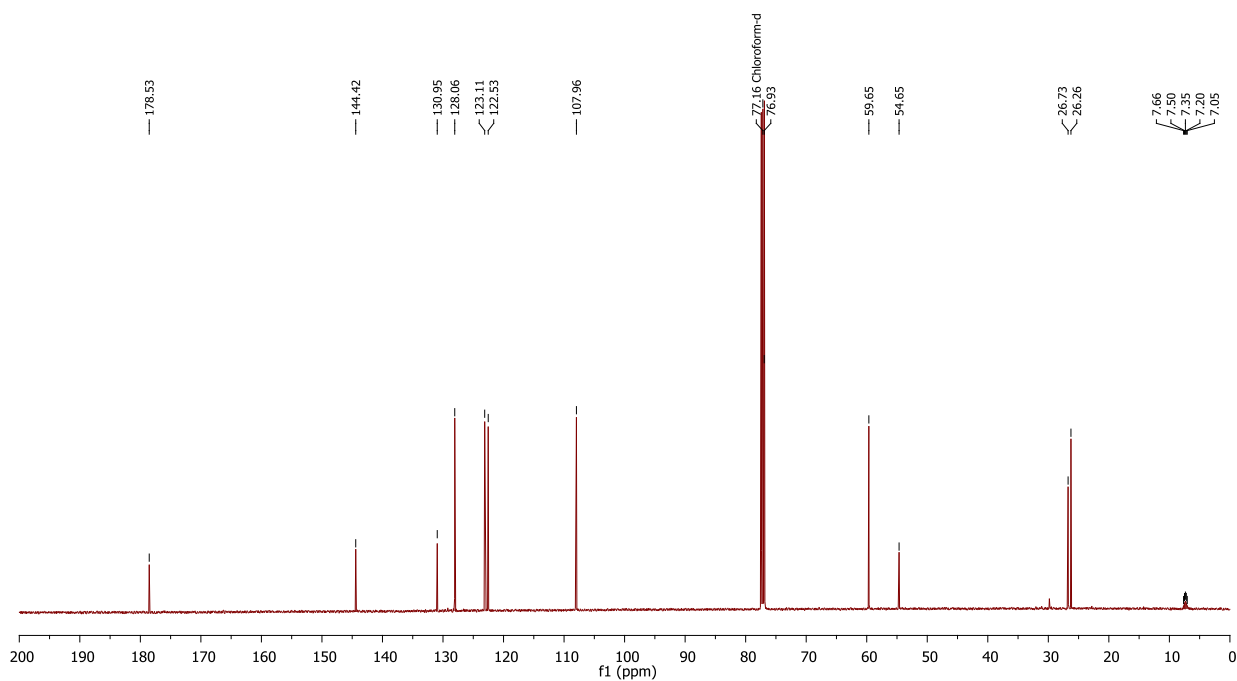

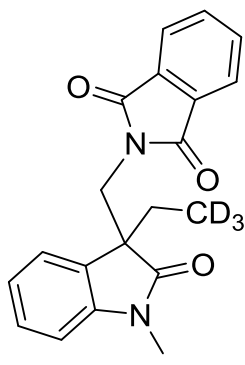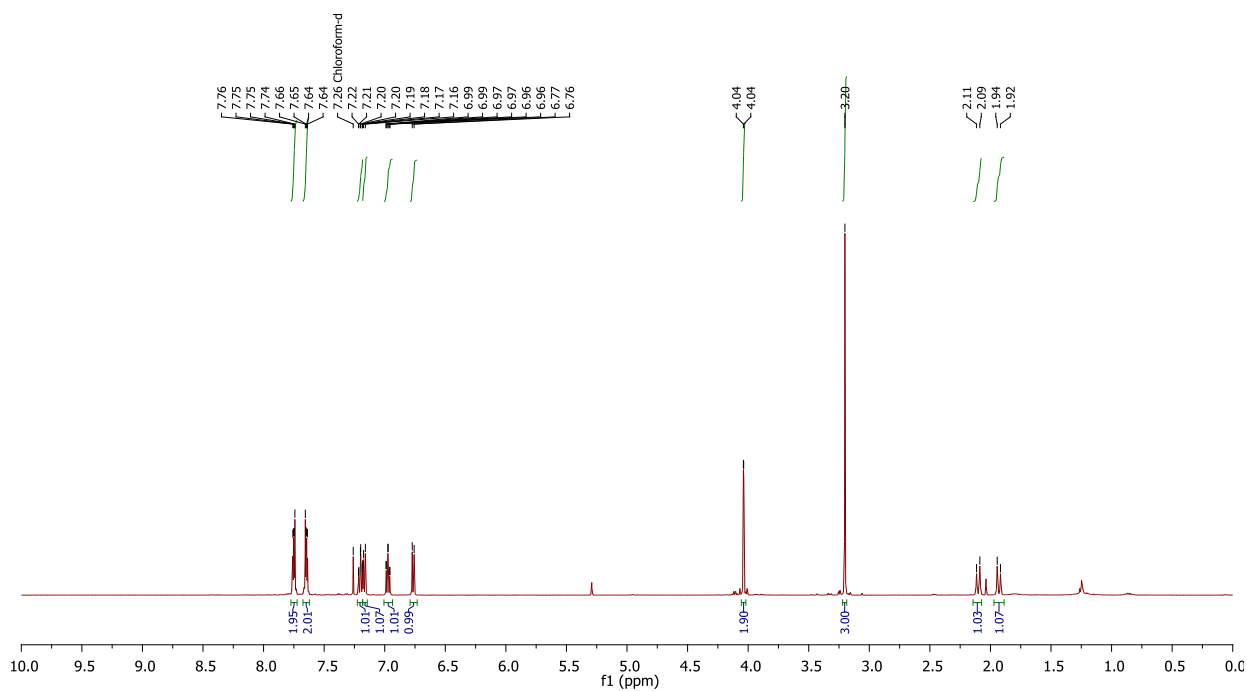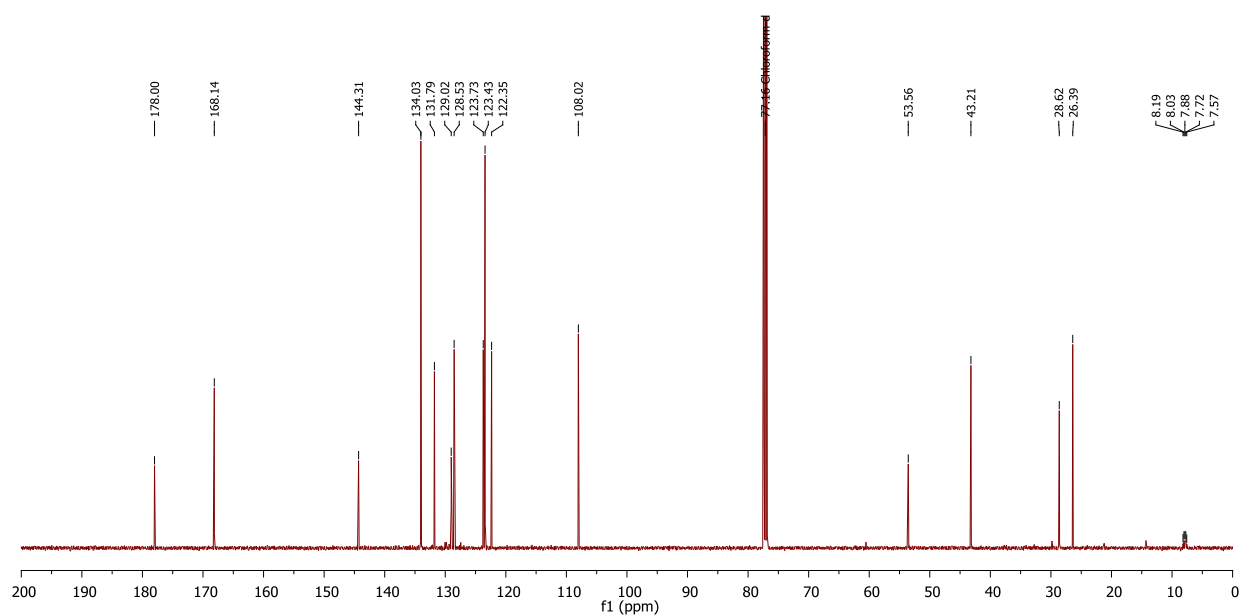

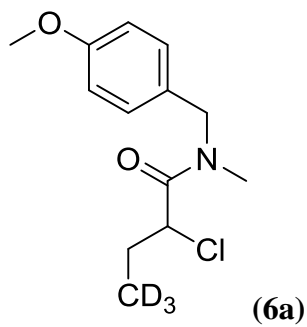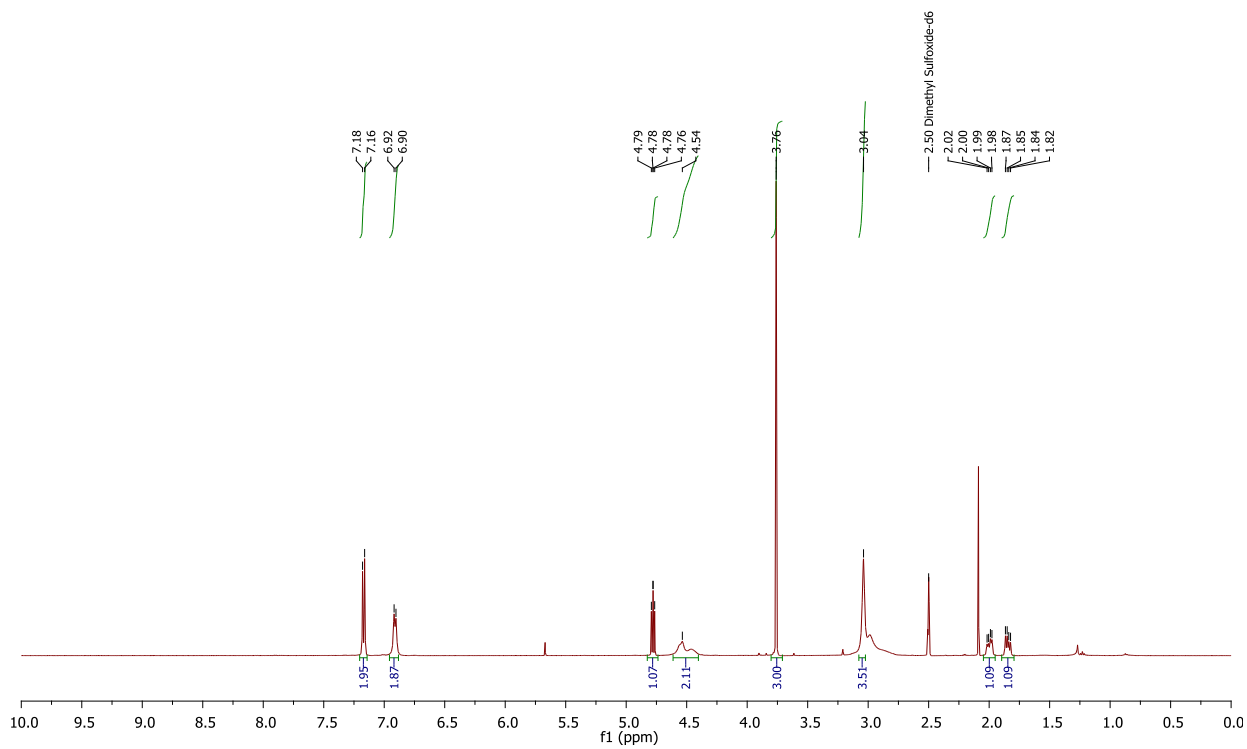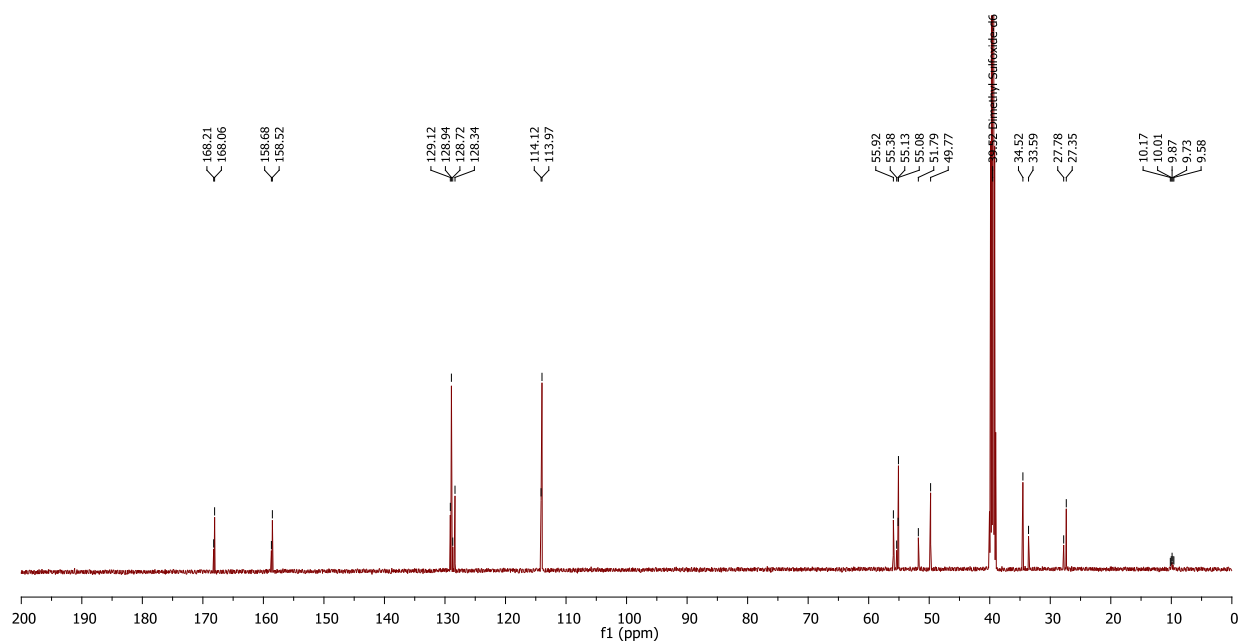

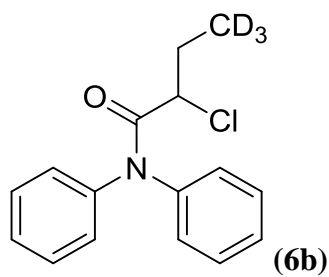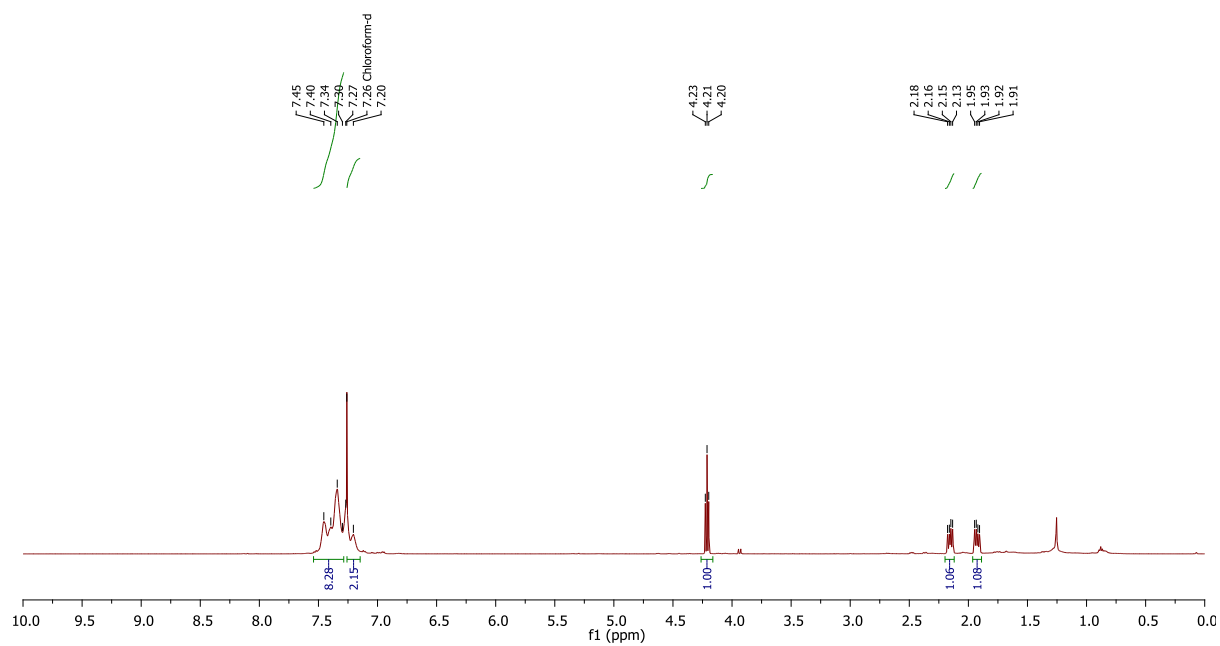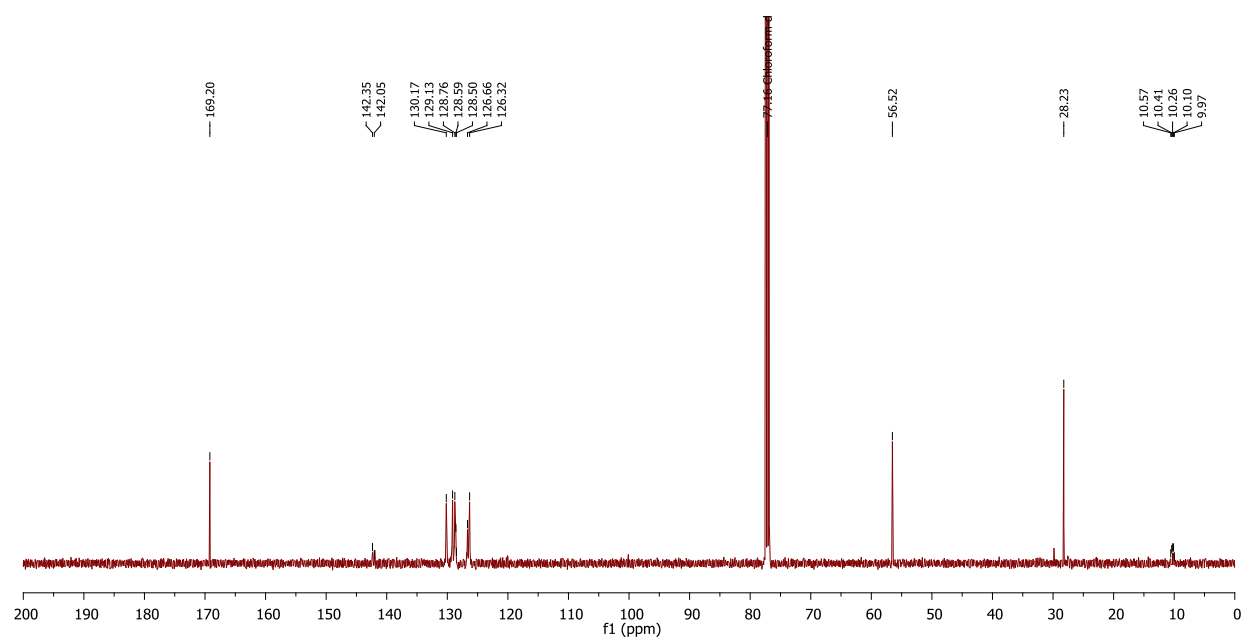

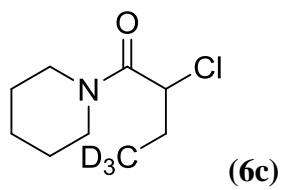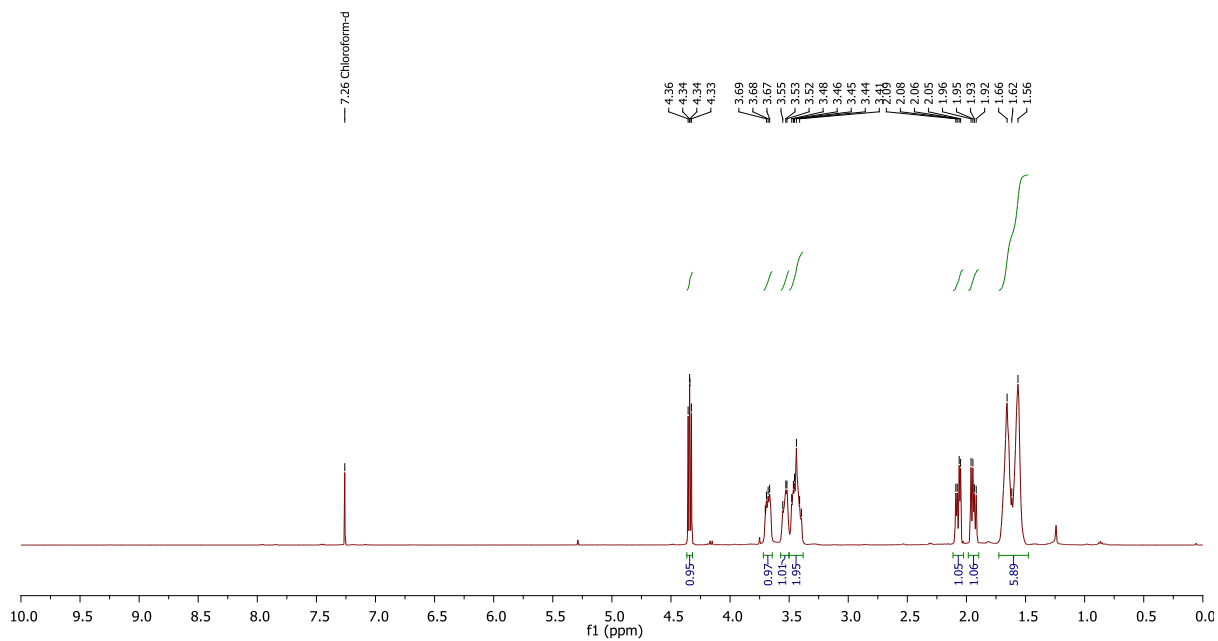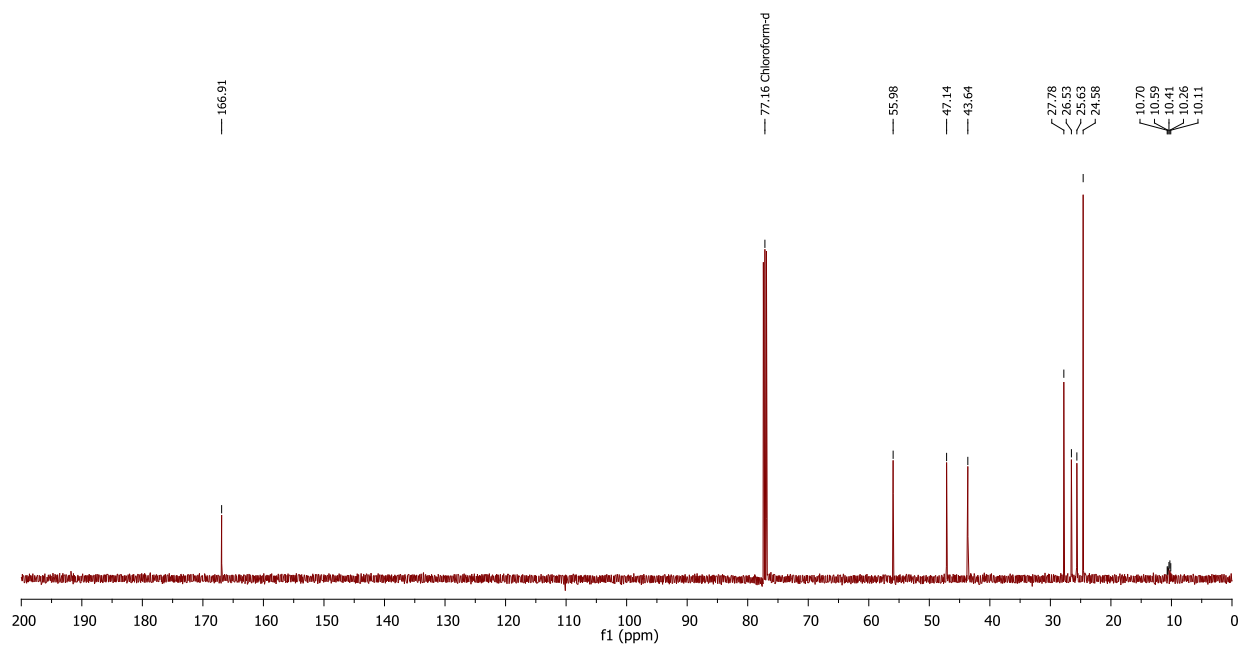

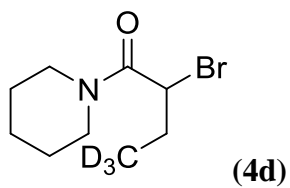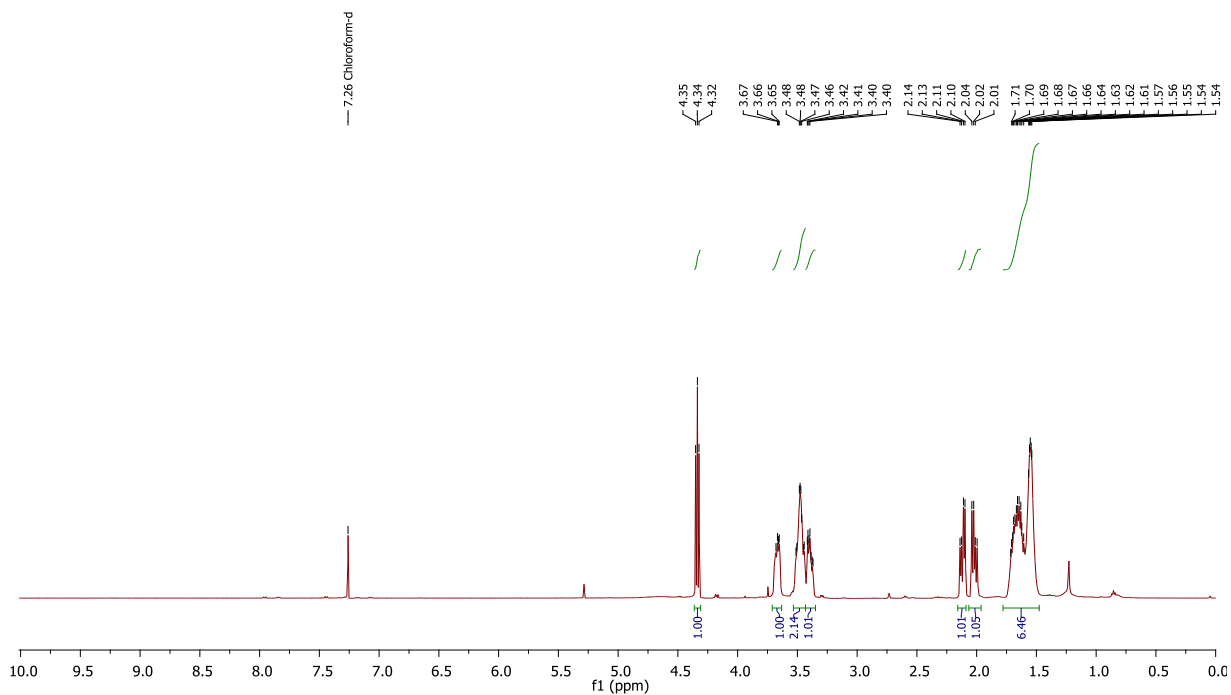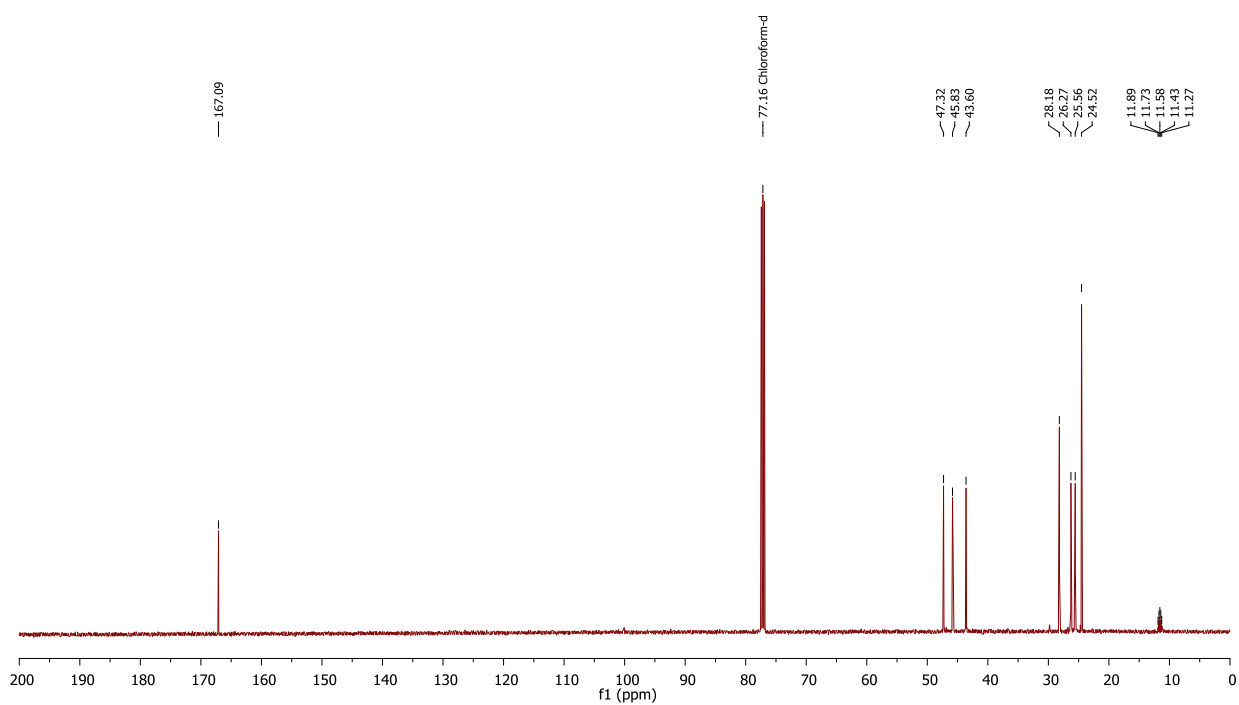



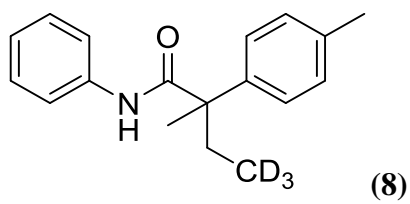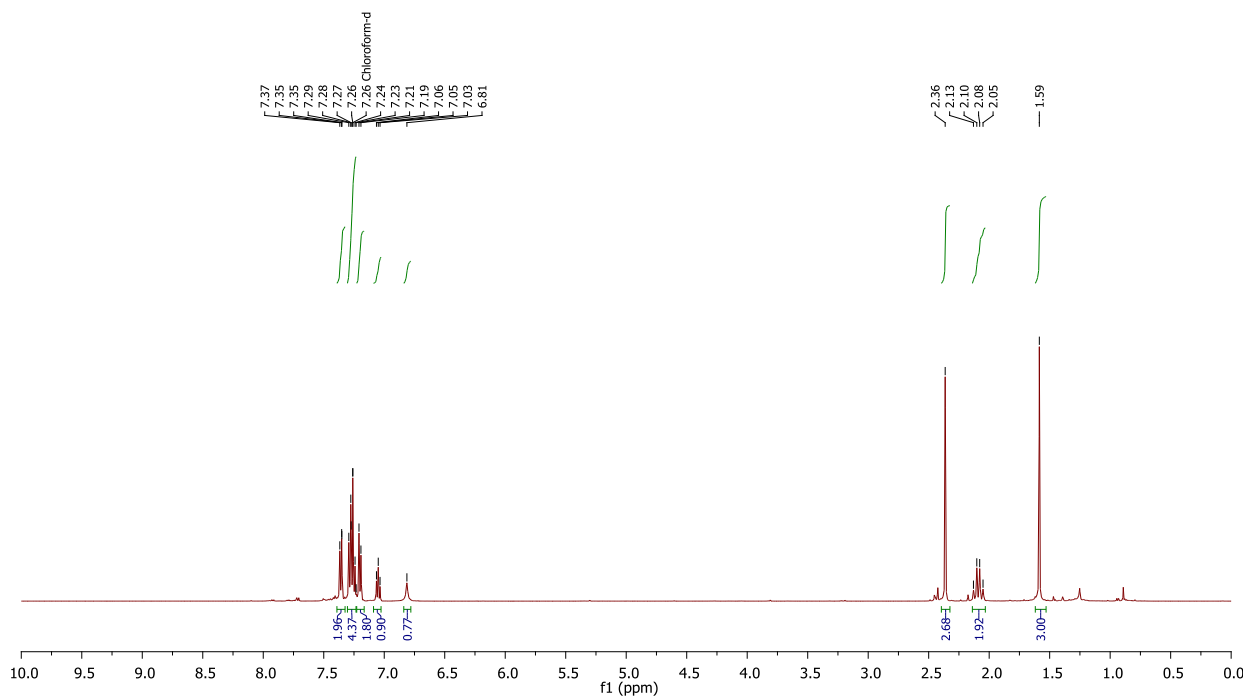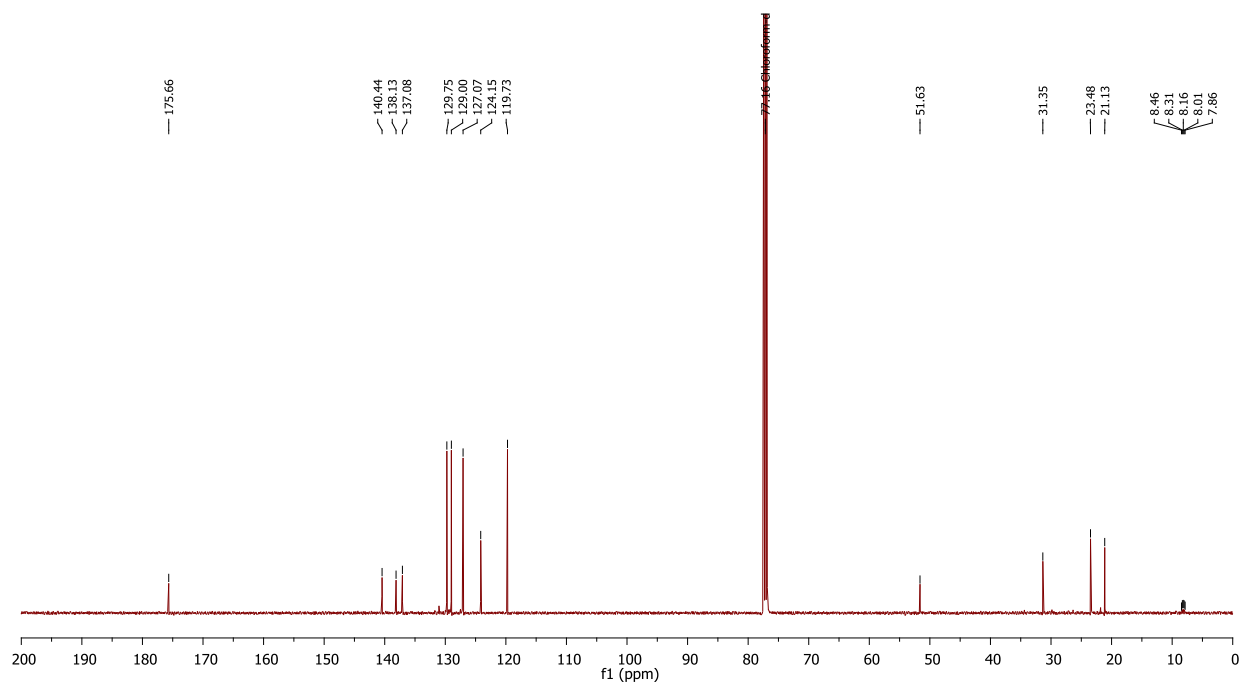

Supplement: c6cc07196a1.pdf [file c6cc07196a1.pdf]
